# Supplementary material for: Fingertip-Measured Skin Carotenoids and Advanced Glycation End Product Levels in Glaucoma
Source: MDPI journal article supplement (doi:10.3390/antiox11061138), 2022-06-09
Supplement: s1 [file s1]

Table S1. Data underlying the manuscript.

| Study ID | Disease | Age | Sex | AGEs     | Vegi     | Smoke | Intake | HT | DM | LogMAR   | IOP | IOPhigh | Med | MD     | Lens | Surgery |
|----------|---------|-----|-----|----------|----------|-------|--------|----|----|----------|-----|---------|-----|--------|------|---------|
| 1        | control | 72  | F   | 0.455    | 224      | 0     |        | y  | n  | 0.09691  | 16  | 16      | 0   |        | y    | n       |
| 2        | POAG    | 70  | M   | 0.42     | 350      | 0     |        | n  | n  | 0.154902 | 55  | 55      | 5   | -27.93 | IOL  | y       |
| 7        | POAG    | 49  | F   | 0.45     | 475      | 0     |        | n  | n  | -0.07918 | 20  | 23      | 0   | -4.43  | y    | n       |
| 8        | POAG    | 39  | M   | 0.295    | 338.5    | 0     |        |    |    | 0        | 10  | 30      | 3   | -14.41 | y    | y       |
| 9        | POAG    | 62  | M   | 0.506667 | 248      | 0     |        | y  | n  | -0.07918 | 21  | 21      | 4   | -29.91 | y    | n       |
| 14       | POAG    | 59  | M   | 0.345    | 164      | 0     |        | y  | y  | 0.522879 | 14  | 14      | 0   | -6.59  | y    | n       |
| 19       | POAG    | 68  | M   | 0.575    | 164.5    | 1     | 2      | y  | n  | 0        | 15  | 27      | 4   | -9.95  | y    | y       |
| 22       | EXG     | 75  | F   | 0.5      | 330      | 0     | 3      | y  | n  | 0.30103  | 16  | 16      | 3   | -18.63 | y    | n       |
| 23       | POAG    | 70  | F   | 0.295    | 244.5    | 0     | 2      | n  | n  | 0.045757 | 19  | 19      | 4   | -8.15  | IOL  | y       |
| 24       | POAG    | 66  | F   | 0.86     | 240.5    | 0     | 2      | n  |    | 1.09691  | 7   | 17      | 0   | -19.7  | IOL  | y       |
| 25       | POAG    | 73  | M   | 0.555    | 130      | 0     | 2      | n  | n  | 0.154902 | 15  | 15      | 1   | -25.94 | y    | y       |
| 26       | EXG     | 70  | F   | 0.395    | 539.5    | 0     | 3      | n  | n  | 0.154902 | 15  | 15      | 3   | -27.75 | y    | n       |
| 27       | POAG    | 66  | M   | 0.43     | 359      | 1     | 3      | n  | n  | -0.07918 | 13  | 13      | 4   | -14.67 | y    | n       |
| 29       | control | 88  | F   | 0.545    | 225.5    | 0     | 2      | y  | n  | 0.30103  | 17  | 17      | 0   |        | y    | n       |
| 39       | control | 65  | M   | 0.42     | 212      | 1     | 2      | y  | n  | -0.07918 | 21  | 21      | 0   |        | y    | n       |
| 42       | EXG     | 71  | F   | 0.3      | 541.5    | 0     | 3      | n  | n  | -0.07918 | 11  | 11      | 2   | -18.33 | y    | n       |
| 43       | POAG    | 71  | F   | 0.33     | 345      | 1     | 3      | y  | n  | 0.09691  | 17  | 17      | 5   | -28.79 | IOL  | y       |
| 44       | POAG    | 53  | M   | 0.383333 | 297      | 0     | 2      | n  | n  | -0.07918 | 13  | 13      | 2   | -17.2  | y    | n       |
| 45       | EXG     | 88  | M   | 0.465    | 269      | 0     | 2      | y  | n  | 0.09691  | 37  | 37      | 3   | -28.24 | IOL  | y       |
| 46       | EXG     | 65  | M   | 0.506667 | 358.5    | 0     | 3      | n  |    | -0.07918 | 24  | 30      | 3   | -15.12 | y    | y       |
| 47       | EXG     | 87  | M   | 0.43     | 312.5    | 0     | 3      | y  | n  | 0.522879 | 8   | 8       | 3   | -25.58 | IOL  | y       |
| 48       | control | 45  | M   | 0.475    | 178      | 1     | 2      | n  | n  | -0.07918 | 11  | 11      | 0   |        | y    | n       |
| 49       | control | 84  | F   | 0.595    | 254      | 0     | 2      | y  | n  | 0.221849 | 15  | 15      | 0   |        | y    | n       |
| 52       | control | 85  | F   | 0.41     | 325.6667 | 0     | 2      | y  | y  | 0        |     |         | 0   |        | IOL  | y       |
| 53       | control | 88  | F   | 0.35     | 294.5    | 0     | 2      | n  | n  | -0.07918 | 10  | 11      | 0   |        | IOL  | y       |
| 54       | control | 96  | F   | 0.5      | 301      | 0     | 2      | y  | n  | 0.39794  | 15  | 20      | 0   |        | IOL  | y       |
| 55       | EXG     | 88  | M   | 0.575    | 310      | 0     | 2      | n  | n  | 0.221849 | 15  | 15      | 3   | -24.03 | y    | n       |
| 59       | control | 66  | M   | 0.465    | 521      | 0     | 2      |    |    | -0.07918 | 14  | 14      | 0   |        | IOL  | y       |
| 60       | control | 70  | M   | 0.475    | 548      | 0     | 3      | n  | n  | 0.221849 | 19  | 19      | 0   |        | y    | n       |
| 61       | POAG    | 62  | F   | 0.46     | 436      | 0     | 2      | n  | n  | -0.07918 | 17  | 17      | 3   | -27.12 | y    | n       |
| 62       | POAG    | 77  | F   | 0.425    | 442      | 0     | 3      | y  | y  | 0.09691  | 15  | 15      | 1   | -11.24 | IOL  | y       |
| 63       | POAG    | 72  | M   | 0.5      | 320      | 0     | 2      |    |    | 0.154902 | 13  | 43      | 3   | -28.75 | IOL  | y       |
| 64       | POAG    | 20  | F   | 0.475    | 227      | 0     | 2      |    |    | -0.07918 | 36  | 36      | 0   | -1.33  | y    | n       |
| 65       | EXG     | 82  | M   | 0.495    | 489.5    | 0     | 2      | y  | n  | 0        | 31  | 31      | 4   | -13.56 | IOL  | y       |
| 66       | EXG     | 77  | F   | 0.386667 | 245.5    | 0     | 3      | y  | n  | 0.39794  | 16  | 16      | 2   | -26.07 | IOL  | y       |
| 68       | EXG     | 67  | M   | 0.37     | 260      | 0     | 0      | n  | n  | 1.30103  | 28  | 28      | 3   | -29.48 | y    | n       |
| 71       | EXG     | 85  | M   | 0.55     | 234.5    | 0     | 2      |    |    | 2.69897  | 12  | 25      | 3   | -23.87 | IOL  | y       |
| 72       | POAG    | 60  | M   | 0.48     | 377      | 0     | 0      | n  | y  | 2        | 36  | 36      | 4   | -26.36 | y    | n       |
| 75       | control | 61  | F   | 0.445    | 390.5    | 0     | 2      | n  | n  | 0.09691  | 12  | 12      | 0   |        | y    | n       |
| 77       | EXG     | 72  | F   | 0.52     | 527      | 0     | 2      | n  | n  | 1.30103  | 28  | 28      | 5   | -25.84 | y    | n       |
| 78       | control | 79  | F   | 0.415    | 382      | 0     | 3      | y  | n  | -0.07918 | 13  | 13      | 0   |        | IOL  | y       |
| 79       | control | 73  | F   | 0.405    | 481.5    | 0     | 2      | y  | n  | -0.07918 | 15  | 17      | 0   |        | IOL  | y       |
| 81       | EXG     | 82  | M   | 0.68     | 162.5    | 0     | 0      | y  | y  | 1.522879 | 38  | 38      | 2   | -30.38 | y    | n       |
| 82       | POAG    | 27  | F   | 0.45     | 162.5    | 0     | 0      | n  | n  | -0.07918 | 13  | 13      | 2   | -12.1  | y    | n       |
| 85       | EXG     | 70  | F   | 0.505    | 482      | 0     | 1      | y  | n  | 0.154902 | 65  | 65      | 6   | -7.9   | IOL  | y       |
| 87       | EXG     | 77  | F   | 0.435    | 272.5    | 0     | 2      |    |    | 0.221849 | 13  | 13      | 1   | -21.34 | IOL  | y       |
| 88       | POAG    | 76  | M   | 0.48     | 299      | 0     | 2      | n  | n  | 2        | 7   | 23      | 0   | -23    | IOL  | y       |
| 91       | control | 65  | F   | 0.545    | 170      | 0     | 2      | n  | n  | 0.522879 | 20  | 20      | 0   |        | y    | n       |
| 92       | control | 70  | M   | 0.49     | 456      | 0     | 0      | y  |    | 0.09691  | 16  | 16      | 0   |        | y    | n       |
| 93       | control | 63  | M   | 0.46     | 375      | 0     | 2      | y  | n  | 0        | 19  | 19      | 0   |        | y    | n       |
| 94       | control | 62  | F   | 0.525    | 225.5    | 0     | 0      | y  | n  | -0.07918 | 18  | 18      | 0   |        | y    | n       |
| 95       | POAG    | 54  | M   | 0.525    | 341      | 0     | 2      | n  | n  | -0.07918 | 28  | 28      | 4   | -20.9  | y    | n       |
| 96       | POAG    | 67  | F   | 0.405    | 549.5    | 0     | 2      |    |    | 0.823909 | 20  | 20      | 1   | -7.01  | y    | n       |
| 97       | POAG    | 69  | M   | 0.52     | 241.5    | 0     | 0      | n  | n  | 0.045757 | 17  | 17      | 3   | -22.85 | y    | y       |
| 98       | POAG    | 67  | F   | 0.42     | 306.5    | 0     | 2      | y  | n  | 0.045757 | 22  | 22      | 1   | -3.22  | y    | n       |
| 100      | POAG    | 58  | M   | 0.445    | 410      | 1     | 3      |    |    | 0.69897  | 17  | 20      | 3   | -16.24 | y    | y       |
| 101      | POAG    | 80  | M   | 0.585    | 437.5    | 0     | 2      | y  | y  | 0.522879 | 43  | 43      | 3   | -9.91  | y    | n       |
| 102      | POAG    | 71  | M   | 0.51     | 209.5    | 0     | 3      |    |    | 0.154902 | 17  | 17      | 3   | -20.39 | IOL  | y       |
| 103      | control | 48  | F   | 0.585    | 226.5    | 0     | 1      | n  | n  | -0.07918 | 16  | 16      | 0   |        | y    | n       |
| 104      | control | 79  | M   | 0.495    | 476.5    | 0     | 3      |    |    | 0.09691  |     |         | 0   |        | y    | n       |
| 105      | POAG    | 62  | M   | 0.56     | 190      | 0     | 2      | y  | y  | 0.045757 | 15  | 17      | 3   | -14.21 | IOL  | y       |
| 109      | EXG     | 86  | M   | 0.41     | 412.5    | 0     | 2      | y  | y  | 0.045757 | 14  | 35      | 0   | -13.72 | IOL  | y       |
| 110      | EXG     | 85  | F   | 0.32     | 400      | 0     | 3      | y  | n  | -0.07918 | 11  | 17      | 0   | -18.94 | IOL  | y       |
| 111      | POAG    | 63  | M   | 0.435    | 188.5    | 1     | 2      | y  | y  | 0        | 21  | 25      | 3   | -20.05 | IOL  | y       |
| 113      | POAG    | 70  | M   | 0.475    | 233      | 0     | 2      | y  | n  | 0.30103  | 13  | 16      | 3   | -18.56 | IOL  | y       |
| 115      | EXG     | 62  | F   | 0.63     | 344      | 0     | 0      |    | y  | 1.39794  | 24  | 24      | 0   | -29.42 | IOL  | y       |
| 118      | control | 68  | F   | 0.46     | 440.5    | 0     | 0      |    |    | -0.07918 | 13  | 13      | 0   |        | IOL  | y       |
| 121      | control | 68  | M   | 0.415    | 202.5    | 1     | 0      | y  | n  | 0.522879 | 15  | 15      | 0   |        | y    | n       |
| 122      | control | 48  | F   | 0.46     | 164.5    | 1     | 0      |    | n  | -0.07918 | 17  | 17      | 0   |        | y    | n       |
| 127      | EXG     | 87  | F   | 0.48     | 325.5    | 0     | 2      | y  | n  | 0.09691  | 5   | 5       | 5   | -23.57 | IOL  | y       |
| 129      | POAG    | 81  | M   | 0.45     | 267      | 0     |        | y  | y  | 0.154902 | 11  | 16      | 3   | -16.18 | y    | n       |
| 130      | EXG     | 79  | M   | 0.415    | 384.5    | 0     | 2      | y  | n  | 0        | 27  | 27      | 3   | -23.32 | IOL  | y       |
| 131      | POAG    | 66  | M   | 0.376667 | 555      | 0     | 0      | y  | y  | -0.07918 | 21  | 21      | 4   | -5.38  | IOL  | y       |
| 132      | control | 88  | F   | 0.53     | 306      | 0     | 2      | y  | n  | -0.07918 | 14  | 14      | 0   |        | y    | n       |
| 134      | POAG    | 78  | F   | 0.33     | 443.5    | 0     | 2      | n  | n  | 0.154902 | 13  | 20      | 2   | -12.52 | IOL  | y       |
| 136      | EXG     | 84  | F   | 0.5      | 491.5    | 0     | 1      | y  | n  | 0.221849 | 9   | 11      | 2   | -26.49 | IOL  | y       |
| 137      | POAG    | 74  | F   | 0.47     | 306      | 0     | 2      |    |    | -0.07918 | 13  | 14      | 3   | -9.49  | IOL  | y       |
| 138      | POAG    | 72  | F   | 0.285    | 285      | 0     | 1      | y  | n  | 0.69897  | 7   | 21      | 0   | -19.69 | IOL  | y       |
| 142      | POAG    | 59  | F   | 0.45     | 226.5    | 0     | 1      | y  | y  | 0.09691  | 25  | 25      | 4   | -18.38 | y    | n       |
| 144      | POAG    | 60  | M   | 0.415    | 406.5    | 0     | 2      | n  | n  | 0        | 16  | 16      | 2   | -14.54 | y    | y       |
| 145      | EXG     | 76  | M   | 0.485    | 323      | 0     | 3      | y  | n  | 0.09691  | 20  | 20      | 2   | -13.82 | y    | n       |
| 146      | POAG    | 68  | F   | 0.465    | 543      | 0     | 3      | n  | n  | 0.221849 | 22  | 22      | 2   | -7.73  | y    | n       |
| 147      | EXG     | 65  | M   | 0.37     | 441.5    | 0     | 2      | y  | y  | -0.07918 | 47  | 47      | 4   | -16.3  | IOL  | y       |
| 148      | POAG    | 76  | M   | 0.38     | 682.5    | 0     | 2      | n  | n  | 0.30103  | 13  | 14      | 0   | -3.38  | y    | n       |
| 150      | POAG    | 64  | M   | 0.22     | 294.5    | 1     | 2      |    |    | 0.39794  | 13  | 28      | 2   | -30.48 | y    | y       |
| 151      | control | 72  | F   | 0.48     | 411.5    | 0     | 3      | n  | y  | 0.045757 | 14  | 14      | 0   |        | y    | n       |
| 152      | POAG    | 71  | M   | 0.435    | 288      | 0     | 0      | n  | y  | 0.30103  | 15  | 16      | 3   | -30.97 | IOL  | y       |
| 155      | POAG    | 66  | F   | 0.425    | 425      | 0     | 3      | n  | n  | -0.07918 | 15  | 21      | 1   | -11.03 | IOL  | y       |
| 157      | control | 75  | F   | 0.465    | 252.5    | 0     | 2      | n  | n  | 0.30103  | 17  | 17      | 0   |        | y    | n       |
| 159      | control | 88  | F   | 0.52     | 569      | 0     | 3      | n  | n  | 0.39794  | 18  | 18      | 0   |        | y    | n       |
| 160      | control | 68  | F   | 0.455    | 457.5    | 0     | 2      | y  | n  | 0.221849 | 11  | 11      | 0   |        | y    | n       |
| 162      | EXG     | 68  | M   | 0.505    | 197.5    | 0     | 2      | y  | n  | 0.09691  | 28  | 28      | 4   | -22.3  | y    | n       |
| 163      | EXG     | 66  | F   | 0.53     | 300.5    | 0     | 2      | n  | n  | 0.154902 | 19  | 19      | 3   | -24.71 | y    | n       |
| 164      | POAG    | 86  | F   | 0.63     | 362.5    | 0     | 1      | y  | n  | 0.30103  | 6   | 6       | 3   | -14.06 | y    | n       |
| 165      | EXG     | 69  | F   | 0.365    | 292.5    | 1     | 2      |    |    | 0.39794  | 17  | 24      | 2   | -22.62 | IOL  | y       |
| 166      | POAG    | 63  | M   | 0.415    | 255.5    | 0     | 2      | y  | y  | 0.69897  | 23  | 23      | 3   | -4.16  | y    | n       |

|     |         |      |       |         |     |   |          |      |    |   |            |   |
|-----|---------|------|-------|---------|-----|---|----------|------|----|---|------------|---|
| 167 | POAG    | 86 M | 0.595 | 117.5 0 | 2 n | y | 2.69897  | 41   | 41 | 4 | -30.35 IOL | y |
| 169 | EXG     | 72 F | 0.485 | 452 0   | 3 y | n | 0        | 16   | 18 | 3 | -19.5 IOL  | y |
| 175 | control | 74 M | 0.485 | 353 1   | 2 y | y | 0        | 19   | 19 | 0 | y          | n |
| 176 | control | 73 F | 0.475 | 557 0   | 3 y |   | 0.221849 |      |    | 0 | y          | n |
| 177 | control | 73 F | 0.45  | 534.5 0 | 2 n | n | -0.07918 | 18   | 18 | 0 | IOL        | y |
| 178 | control | 70 M | 0.55  | 260.5 0 | 0 y | n | 0        | 18   | 18 | 0 | y          | n |
| 179 | EXG     | 67 M | 0.46  | 285 1   | 2   |   | 0        | 19   | 21 | 0 | -1.84 y    | n |
| 182 | POAG    | 68 M | 0.615 | 269.5 0 | 2 y | y | -0.07918 | 19   | 21 | 1 | -16.92 IOL | y |
| 183 | EXG     | 69 M | 0.5   | 192.5 0 | 1 y |   | 0.69897  | 17   | 47 | 4 | -20.17 IOL | y |
| 184 | EXG     | 77 M | 0.55  | 273.5 0 | 2 y | n | 0.045757 | 26   | 26 | 5 | -29.8 y    | n |
| 185 | EXG     | 79 F | 0.42  | 325 0   | 2 y | n | 0.69897  | 48   | 48 | 4 | -13.12 IOL | y |
| 189 | POAG    | 62 M | 0.5   | 355.5 0 | 2   |   | -0.07918 | 17   | 25 | 3 | -19.29 IOL | y |
| 191 | control | 76 M | 0.57  | 256.5 0 | 1 y | y | -0.07918 | 14   | 14 | 0 | IOL        | y |
| 194 | POAG    | 69 F | 0.405 | 380.5 0 | 2 y | n | 0.39794  | 22   | 22 | 3 | -12.18 y   | n |
| 195 | POAG    | 70 F | 0.52  | 470.5 0 | 2 y | n | 0.154902 | 21   | 21 | 3 | -19.57 y   | n |
| 196 | POAG    | 63 F | 0.565 | 214 1   | 2 y | n | -0.07918 | 17   | 17 | 3 | -19.23 y   | n |
| 199 | EXG     | 79 M | 0.52  | 606 0   | 2 n | y | 0.154902 | 29   | 29 | 3 | -18.88 IOL | y |
| 200 | POAG    | 47 F | 0.425 | 594.5 0 | 3 y | n | -0.07918 | 19   | 22 | 2 | -0.77 y    | n |
| 201 | EXG     | 89 F | 0.29  | 200.5 0 | 2 y | n | 1.69897  | 19   | 54 | 0 | -29.98 IOL | y |
| 202 | EXG     | 72 F | 0.455 | 603 0   | 3 n | n | 2.60206  | 47   | 47 | 4 | -29.47 IOL | y |
| 203 | POAG    | 87 M | 0.49  | 340 0   | 3   |   | 0.045757 | 5    | 24 | 3 | -27.64 IOL | y |
| 206 | control | 78 F | 0.505 | 399.5 0 | 3 y | y | 0.30103  | 14   | 14 | 0 | y          | n |
| 209 | EXG     | 70 F | 0.38  | 520 0   | 1 n | n | 0.221849 | 21   | 21 | 4 | -21.31 IOL | y |
| 210 | EXG     | 74 F | 0.49  | 514.5 0 | 0 n | n | -0.07918 | 37   | 37 | 4 | -20.22 IOL | y |
| 211 | POAG    | 86 M | 0.43  | 405 0   | 2 n | y | 0.522879 | 14   | 14 | 4 | -11.82 y   | n |
| 212 | EXG     | 62 F | 0.44  | 347 0   | 0 n | n | 0        | 19   | 19 | 3 | -7.3 y     | n |
| 214 | POAG    | 82 F | 0.465 | 375.5 0 | 2 y | n | 0.09691  | 30   | 30 | 4 | -6.63 IOL  | y |
| 215 | EXG     | 67 F | 0.455 | 380 0   | 3 y | n | 0.045757 | 21   | 21 | 3 | -5.35 y    | n |
| 216 | POAG    | 86 F | 0.475 | 383.5 0 | 3 y | y | 0.045757 | 35   | 35 | 3 | -29.15 IOL | y |
| 217 | EXG     | 77 F | 0.545 | 331.5 0 | 3   |   | 0.221849 | 13   | 39 | 2 | -21.34 IOL | y |
| 218 | control | 74 M | 0.5   | 413 0   | 2 n | y | 0.39794  | 12   | 12 | 0 | y          | n |
| 219 | control | 80 M | 0.48  | 258.5 0 | 2 y | n | 0.045757 | 14   | 14 | 0 | y          | n |
| 221 | EXG     | 61 F | 0.525 | 475.5 0 | 2 n | n | 0.69897  | 21   | 21 | 2 | -8.71 IOL  | y |
| 222 | POAG    | 76 M | 0.42  | 444 0   | 2   |   | 0.221849 | 10   | 25 | 3 | -28.85 IOL | y |
| 223 | POAG    | 66 M | 0.75  | 238 0   | 2 y | n | 2.69897  | 4    | 16 | 0 | -17.97 y   | y |
| 224 | EXG     | 83 F | 0.62  | 345.5 0 | 2 y | n | 1.221849 | 31   | 31 | 5 | -29.19 y   | n |
| 226 | POAG    | 64 F | 0.38  | 355.5 0 | 2 n | n | -0.07918 | 17   | 19 | 3 | -3.46 y    | n |
| 228 | POAG    | 69 M | 0.585 | 218.5 0 | 0 y | y | 1        | 12   | 42 | 2 | -29.56 IOL | y |
| 230 | POAG    | 71 M | 0.355 | 328.5 1 | 2 y | y | -0.07918 | 13   | 19 | 3 | -6.49 IOL  | y |
| 231 | POAG    | 55 M | 0.38  | 203 0   | 2   |   | 0        | 11.7 | 50 | 3 | -29.28 IOL | y |
| 234 | POAG    | 53 F | 0.6   | 313.5 0 | 1   |   | -0.07918 | 14   | 23 | 2 | -2.1 IOL   | y |
| 236 | POAG    | 66 F | 0.44  | 469.5 0 | 2 y | n | 0        | 20   | 20 | 3 | -11.27 y   | n |
| 237 | POAG    | 69 F | 0.375 | 514 0   | 2 y | n | 0.30103  | 15   | 31 | 3 | -21.9 y    | n |
| 241 | EXG     | 66 M | 0.315 | 213 0   | 2 y | n | 0.221849 | 22   | 22 | 3 | -21.3 y    | n |
| 242 | EXG     | 71 M | 0.505 | 304.5 0 | 2 y | y | 0.045757 | 14   | 14 | 2 | -18.71 IOL | y |
| 244 | POAG    | 64 F | 0.4   | 794 0   | 2 y | y | -0.07918 | 17   | 17 | 2 | -10.19 IOL | y |
| 245 | POAG    | 72 M | 0.385 | 338.5 0 | 2 y |   | 0.045757 | 11   | 24 | 2 | -27.22 IOL | y |
| 246 | EXG     | 73 M | 0.605 | 334.5 0 | 0   |   | -0.07918 | 15   | 17 | 3 | -2.27 IOL  | y |
| 247 | EXG     | 79 F | 0.47  | 431 0   | 2 y | y | 0.154902 | 22   | 22 | 3 | -8.25 IOL  | y |
| 248 | POAG    | 66 F | 0.86  | 240.5 0 | 2   |   | 1.09691  | 7    | 17 | 0 | -20.99 IOL | y |
| 249 | control | 78 M | 0.38  | 303 1   | 3 n | y | 0.09691  | 16   | 16 | 0 | y          | n |
| 250 | POAG    | 54 F | 0.365 | 226 0   | 2 y | n | -0.07918 | 18   | 18 | 0 | -0.72 y    | n |
| 252 | control | 61 M | 0.435 | 595.5 0 | 2   |   | -0.07918 |      |    | 0 | y          | n |
| 254 | POAG    | 79 F | 0.5   | 378.5 0 | 1 y | y | 1.045757 | 15   | 17 | 3 | -25.77 IOL | y |
| 255 | POAG    | 61 M | 0.46  | 252 1   | 0   |   | 0.69897  | 11   | 21 | 4 | -9.93 IOL  | y |
| 256 | EXG     | 85 M | 0.675 | 148.5 1 | 0 y | n | 0        | 13   | 26 | 2 | -16.04 IOL | y |
| 257 | POAG    | 61 M | 0.525 | 363 0   | 0 n | y | 1.39794  | 14   | 36 | 4 | -26.36 IOL | y |
| 258 | POAG    | 79 F | 0.485 | 527.5 0 | 2   |   | -0.07918 | 10   | 15 | 3 | -21.03 y   | n |
| 259 | POAG    | 67 F | 0.385 | 412 0   | 2 y | n | 0        | 9    | 16 | 1 | -24.78 IOL | y |
| 261 | EXG     | 66 M | 0.49  | 255.5 1 | 2 y | n | -0.07918 | 11   | 19 | 3 | -12.02 IOL | y |
| 264 | POAG    | 42 F | 0.325 | 265.5 1 | 2 n | n | -0.07918 | 17   | 22 | 4 | -8.24 y    | n |
| 265 | POAG    | 65 M | 0.485 | 362 0   | 3 y | n | 0.154902 | 13   | 15 | 3 | -13.88 y   | n |
| 268 | POAG    | 79 M | 0.455 | 395.5 0 | 2 y | y | 0.09691  | 15   | 15 | 3 | -12.1 y    | n |
| 269 | POAG    | 69 F | 0.315 | 334.5 0 | 1 n | n | 0        | 19   | 19 | 0 | -4.67 y    | n |
| 271 | POAG    | 60 M | 0.495 | 249 0   | 2   |   | 0.30103  | 28   | 28 | 2 | -16.26 y   | n |
| 272 | EXG     | 86 M | 0.465 | 166.5 0 | 1   |   | 1.39794  | 11   | 25 | 3 | -23.87 IOL | y |
| 273 | POAG    | 66 M | 0.375 | 206.5 0 |     | n | -0.07918 | 15   | 17 | 3 | -20.76 IOL | y |
| 274 | POAG    | 67 M | 0.385 | 175 0   | 2 n | n | -0.07918 | 31   | 31 | 1 | -12.75 IOL | y |
| 275 | POAG    | 53 M | 0.42  | 122 0   | 2 y | n | -0.07918 | 21   | 21 | 1 | -17.12 IOL | y |
| 278 | POAG    | 50 M | 0.495 | 428.5 0 | 3 n | n | -0.07918 | 19   | 23 | 4 | -9.59 IOL  | y |
| 279 | EXG     | 68 F | 0.5   | 248 1   | 2   |   | -0.07918 | 13   | 28 | 3 | -2.49 y    | n |
| 280 | POAG    | 66 F | 0.455 | 338.5 0 | 2 y | n | 1        | 12   | 20 | 1 | -17.71 IOL | y |
| 281 | POAG    | 80 M | 0.505 | 383 0   | 3 n | y | -0.07918 | 15.7 | 29 | 3 | -11.45 IOL | y |
| 282 | POAG    | 73 M | 0.49  | 151.5 0 | 2   | y | -0.07918 | 15   | 21 | 4 | -15.85 IOL | y |
| 284 | POAG    | 69 M | 0.505 | 123.5 0 | 1 y | y | -0.07918 | 19   | 22 | 3 | -22.59 IOL | y |
| 287 | control | 82 F | 0.395 | 463.5 0 | 3 n | n | 0        |      |    | 0 | IOL        | y |
| 290 | POAG    | 77 F | 0.325 | 537 0   | 2 y | n | 0.221849 | 20   | 20 | 2 | -19.54 IOL | y |
| 291 | POAG    | 57 F | 0.495 | 265.5 0 | 2 y | n | 0.30103  | 15   | 15 | 3 | -13.54 y   | n |
| 292 | EXG     | 87 F | 0.47  | 291 0   | 2 y | y | 2.60206  | 23   | 23 | 1 | -30.29 IOL | y |
| 293 | POAG    | 71 M | 0.5   | 243 0   | 3 y | n | 0.39794  | 42   | 44 | 3 | -15.48 IOL | y |
| 294 | EXG     | 79 M | 0.53  | 202 0   | 3 n | n | 0.522879 | 27   | 27 | 3 | -21.58 IOL | y |
| 295 | POAG    | 64 M | 0.455 | 394.5 0 | 2 n | n | 0.30103  | 19   | 27 | 4 | -30.23 y   | y |
| 296 | EXG     | 76 F | 0.445 | 305 0   | 1 n | y | 0        | 15   | 29 | 2 | -5.42 IOL  | y |
| 297 | EXG     | 82 F | 0.52  | 373.5 0 | 3 y | n | 0.39794  | 21   | 21 | 3 | -7.31 IOL  | y |
| 299 | EXG     | 78 F | 0.74  | 317 0   | 3 n | n | 0        | 13   | 17 | 1 | -2.05 IOL  | y |
| 300 | control | 72 F | 0.555 | 409.5 0 | 0 n | n | 0.154902 | 12   | 12 | 0 | y          | n |
| 301 | POAG    | 74 M | 0.47  | 427 0   | 2 y | n | -0.07918 | 17   | 31 | 2 | -6 IOL     | y |
| 302 | POAG    | 79 F | 0.37  | 340.5 0 | 2   |   | 1.39794  | 20   | 30 | 2 | -27.86 IOL | y |
| 303 | POAG    | 73 F | 0.375 | 572.5 0 | 0   |   | -0.07918 | 15   | 18 | 2 | -13.47 IOL | y |
| 304 | POAG    | 62 F | 0.46  | 182.5 0 | 0   |   | 0.522879 | 17   | 25 | 0 | -20.18 IOL | y |
| 305 | POAG    | 58 F | 0.355 | 467 0   | 3 n | n | -0.07918 | 20   | 20 | 3 | -6.51 IOL  | y |
| 306 | POAG    | 62 F | 0.48  | 309.5 0 | 3 n | n | 0        | 12   | 17 | 3 | -22.59 IOL | y |
| 308 | EXG     | 78 M | 0.665 | 140.5 0 | 0 y | y | -0.07918 | 12   | 26 | 3 | -28.4 IOL  | y |
| 309 | POAG    | 73 M | 0.34  | 269 0   | 2   |   | -0.07918 | 11   | 20 | 3 | -22.26 IOL | y |
| 310 | POAG    | 35 M | 0.42  | 170 1   | 0 n | n | 0.154902 | 22   | 57 | 4 | -25.47 y   | y |
| 311 | POAG    | 69 F | 0.39  | 239 0   | 2 y |   | 0.522879 | 11   | 23 | 0 | -7.62 y    | y |
| 312 | POAG    | 77 M | 0.45  | 325 0   | 2 y |   | -0.07918 | 24   | 24 | 2 | -15.28 IOL | y |

|     |         |      |       |         |     |   |          |    |    |   |            |   |
|-----|---------|------|-------|---------|-----|---|----------|----|----|---|------------|---|
| 313 | POAG    | 59 M | 0.38  | 306 0   | 2 n | n | 0        | 10 | 15 | 4 | -10.31 y   | n |
| 314 | POAG    | 61 F | 0.355 | 405.5 0 | 2   |   | -0.07918 | 17 | 19 | 3 | -4.03 IOL  | y |
| 315 | POAG    | 64 M | 0.435 | 525 0   | y   | n | -0.07918 | 17 | 17 | 3 | -8.92 y    | n |
| 316 | POAG    | 64 M | 0.505 | 410.5 0 | 3 y | n | -0.07918 | 16 | 16 | 4 | -10.99 y   | n |
| 317 | POAG    | 68 M | 0.36  | 438.5 0 | 3 y | n | 0.39794  | 17 | 19 | 1 | -10.04 y   | n |
| 320 | POAG    | 64 F | 0.53  | 460 0   | 2 n | n | 0.221849 | 23 | 23 | 1 | -23.27 y   | n |
| 323 | POAG    | 64 F | 0.48  | 402 0   | 3 y | n | 0.154902 | 20 | 20 | 4 | -13.76 y   | n |
| 324 | EXG     | 86 M | 0.51  | 385.5 0 | 3 n | n | 0.823909 | 21 | 21 | 4 | -11.06 y   | n |
| 326 | POAG    | 51 F | 0.435 | 323 0   | 2   |   | 0.522879 | 16 | 18 | 3 | -24.65 IOL | y |
| 327 | control | 67 F | 0.3   | 480 0   | 2 n | n | 0.09691  | 18 | 18 | 0 | y          | n |
| 330 | POAG    | 51 M | 0.42  | 253.5 0 | 0   |   | -0.07918 | 19 | 58 | 4 | -1.51 y    | y |
| 332 | EXG     | 59 F | 0.355 | 343.5 0 | 2 y |   | 0.30103  | 9  | 17 | 3 | -27.75 IOL | y |
| 333 | EXG     | 75 F | 0.645 | 369.5 0 | 0   |   | 0        | 11 | 11 | 3 | -5.77 IOL  | y |
| 334 | POAG    | 87 M | 0.4   | 225.5 0 | 1 n | n | 0.522879 | 13 | 13 | 0 | -29.61 IOL | y |
| 340 | EXG     | 68 F | 0.3   | 573.5 0 | 3 y | n | -0.07918 | 13 | 39 | 1 | -13.51 IOL | y |
| 341 | EXG     | 76 M | 0.43  | 532.5 0 | 3 y | n | 0.221849 | 17 | 28 | 0 | -24.87 IOL | y |
| 342 | POAG    | 84 M | 0.435 | 354.5 0 | 3 n | n | 0.09691  | 13 | 14 | 3 | -31.45 IOL | y |
| 344 | POAG    | 55 M | 0.415 | 403     | n   | n | 0        | 12 | 12 | 2 | -21.48 y   | n |
| 345 | EXG     | 87 F | 0.505 | 268 0   | 3 y | y | 0.39794  | 29 | 30 | 4 | -30.29 IOL | y |
| 346 | POAG    | 65 M | 0.495 | 368 0   | 3 y | n | -0.07918 | 25 | 25 | 3 | -9.63 y    | n |
| 348 | POAG    | 73 M | 0.45  | 246 0   | 2   |   | 0.522879 | 22 | 31 | 3 | -20.11 IOL | y |
| 350 | control | 80 M | 0.455 | 417 0   | 3 y | y | 0.221849 | 10 | 10 | 0 | y          | n |
| 355 | POAG    | 59 M | 0.455 | 216 0   | 2 n | n | 0.30103  | 13 | 23 | 3 | -9.79 IOL  | y |
| 356 | EXG     | 81 M | 0.42  | 201 0   | 2   |   | 0        | 4  | 26 | 0 | -29.17 IOL | y |
| 360 | POAG    | 44 F | 0.37  | 347 0   | 1   |   | 0        | 13 | 13 | 3 | -13.03 y   | n |
| 361 | POAG    | 70 F | 0.255 | 434 0   | 3 y |   | 1        | 15 | 25 | 2 | -26.44 IOL | y |
| 362 | POAG    | 69 F | 0.41  | 265.5 0 | 2 y |   | 1.221849 | 11 | 38 | 3 | -28.7 IOL  | y |
| 363 | POAG    | 63 F | 0.4   | 432 0   | 3 y | n | 0.39794  | 19 | 26 | 3 | -9.59 IOL  | y |
| 365 | POAG    | 55 M | 0.365 | 136 1   | 0 y | n | -0.07918 | 10 | 22 | 1 | -10.32 y   | y |
| 367 | EXG     | 83 M | 0.355 | 197.5 0 | 0   |   | 0.30103  | 16 | 19 | 1 | -27.44 IOL | y |
| 369 | control | 84 F | 0.475 | 259.5 0 | 2 y |   | 0.30103  | 12 | 12 | 0 | y          | n |
| 373 | POAG    | 81 F | 0.47  | 208.5 0 | 2   |   | 0.045757 | 12 | 12 | 1 | -30.67 IOL | y |
| 376 | EXG     | 88 M | 0.505 | 450 0   | 0 y | n | 1.522879 | 43 | 43 | 3 | -26.82 IOL | y |
| 377 | POAG    | 60 M | 0.4   | 493.5 1 | 2 n | n | 0        | 13 | 14 | 3 | -18.85 y   | n |
| 379 | EXG     | 76 F | 0.54  | 240.5 1 | 2 y | n | 0.221849 | 15 | 15 | 3 | -13.67 y   | n |
| 382 | EXG     | 71 F | 0.555 | 469.5 0 | 2 n | n | 0.39794  | 15 | 16 | 3 | -15.34 IOL | y |
| 384 | EXG     | 73 F | 0.47  | 402.5 0 | 2 y | n | 0.221849 | 23 | 23 | 3 | -23.83 IOL | y |
| 385 | EXG     | 73 M | 0.475 | 533 0   | 2   |   | 0        | 22 | 29 | 3 | -11.86 IOL | y |
| 387 | POAG    | 66 M | 0.435 | 191 0   | 0 n | n | 0.522879 | 15 | 27 | 0 | -31.59 y   | y |
| 389 | EXG     | 81 F | 0.325 | 241.5 0 | 3   |   | -0.07918 | 9  | 45 | 2 | -13.35 IOL | y |
| 391 | EXG     | 79 M | 0.3   | 530.5 0 | 2 y | n | 2.60206  | 18 | 36 | 3 | -33.52 IOL | y |
| 393 | POAG    | 79 F | 0.405 | 329 0   | 2 y | n | 0        | 15 | 19 | 2 | -27.48 IOL | y |
| 394 | EXG     | 69 M | 0.965 | 295.5 0 | 2 y | n | -0.07918 | 11 | 21 | 2 | -14.57 IOL | y |
| 395 | EXG     | 88 M | 0.6   | 271 0   | 1 y | n | 0.39794  | 11 | 24 | 2 | -25.99 IOL | y |
| 400 | POAG    | 80 M | 0.505 | 162.5 0 | 1 y | n | 0.09691  | 10 | 11 | 3 | -26.47 IOL | y |
| 403 | POAG    | 52 F | 0.405 | 553 0   | 2   |   | 0.823909 | 11 | 20 | 4 | -12.22 y   | n |
| 404 | POAG    | 86 M | 0.36  | 157.5 0 | 2 y | n | 0.221849 | 14 | 14 | 1 | -18.97 y   | n |
| 405 | POAG    | 80 F | 0.53  | 382.5 0 | 1   |   | -0.07918 | 12 | 15 | 3 | -13.33 IOL | y |
| 406 | POAG    | 78 M | 0.52  | 463 0   | 1 n | n | 0.221849 | 15 | 15 | 1 | -2.32 y    | n |
| 408 | control | 70 F | 0.595 | 230.5 0 | 1 n | n | -0.07918 | 14 | 14 | 0 | -1.15 y    | n |
| 411 | EXG     | 48 M | 0.445 | 169.5 0 | 1 n | n | 0.154902 | 7  | 29 | 2 | -10.89 IOL | y |
| 419 | POAG    | 59 F | 0.4   | 319.5 0 | 2 n | n | -0.07918 | 15 | 15 | 2 | -10.09 IOL | y |
| 420 | POAG    | 71 M | 0.445 | 368 0   | 2 y | y | 0.154902 | 14 | 14 | 1 | -5.07 IOL  | y |
| 422 | EXG     | 86 M | 0.58  | 350.5 0 | 3 y | y | 0.30103  | 13 | 29 | 2 | -17.2 IOL  | y |
| 424 | POAG    | 58 M | 0.575 | 302.5 0 | 3 y | n | 0        | 47 | 47 | 4 | -2.06 y    | y |
| 427 | EXG     | 65 F | 0.42  | 451 0   | 3 n | n | 0.09691  | 16 | 58 | 4 | -22.46 y   | n |
| 428 | EXG     | 86 F | 0.55  | 186 0   | 1 y | y | 0.522879 | 11 | 34 | 1 | -20.96 IOL | y |
| 429 | EXG     | 67 M | 0.45  | 234 1   | 0 n | n | 0.221849 | 15 | 19 | 2 | -20.42 IOL | y |
| 430 | POAG    | 65 F | 0.395 | 668 0   | 3 n | n | -0.07918 | 17 | 23 | 4 | -11.39 IOL | y |
| 431 | POAG    | 68 F | 0.585 | 247.5 0 | 2   |   | -0.07918 | 11 | 26 | 2 | -11.48 IOL | y |
| 438 | POAG    | 60 M | 0.545 | 373 0   | 2   |   | 0.045757 | 13 | 49 | 1 | -15.02 IOL | y |
| 440 | POAG    | 69 M | 0.515 | 360.5 0 | 3 y | n | 0.522879 | 11 | 17 | 2 | -28.76 IOL | y |
| 441 | POAG    | 74 M | 0.505 | 590 0   | 3   |   | 0.09691  | 5  | 27 | 0 | -23.97 IOL | y |
| 442 | POAG    | 69 F | 0.33  | 551.5 0 | 3 n | n | 0.30103  | 11 | 17 | 1 | -25.21 IOL | y |
| 444 | EXG     | 74 M | 0.53  | 268.5 0 | 2 y | n | 0.09691  | 25 | 25 | 3 | -21.94 IOL | y |
| 445 | EXG     | 85 F | 0.575 | 347 0   | 2 y | n | 0.39794  | 19 | 19 | 1 | -4.97 y    | n |
| 447 | EXG     | 89 F | 0.52  | 478.5 0 | 2 y | n | 0.221849 | 26 | 26 | 4 | -29.78 IOL | y |
| 449 | EXG     | 88 F | 0.48  | 357 0   | 2 n | n | 0.69897  | 21 | 23 | 0 | -26.64 y   | n |
| 452 | POAG    | 71 M | 0.43  | 285 1   | 3 y | n | -0.07918 | 13 | 24 | 3 | -9.08 IOL  | y |
| 457 | POAG    | 76 M | 0.53  | 218.5 0 | 0   |   | -0.07918 | 9  | 38 | 0 | -15.01 IOL | y |
| 458 | POAG    | 63 M | 0.455 | 508.5 0 | 3   |   | 0.154902 | 14 | 18 | 0 | -12.68 y   | n |
| 461 | POAG    | 73 F | 0.46  | 428 0   | 2   | y | -0.07918 | 15 | 19 | 2 | -9.24 IOL  | y |
| 463 | POAG    | 61 F | 0.5   | 186.5 0 | 2 n | n | 0.30103  | 21 | 21 | 2 | -6.03 y    | y |
| 464 | EXG     | 70 M | 0.47  | 290 0   | 2 y | n | 0.09691  | 13 | 25 | 4 | -26.02 IOL | y |
| 465 | POAG    | 75 M | 0.595 | 290.5 0 | 2 n | n | 0        | 19 | 32 | 2 | -0.51 y    | n |
| 466 | POAG    | 69 M | 0.48  | 302.5 0 | 2 n | n | 0        | 15 | 15 | 4 | -15.52 y   | n |
| 468 | POAG    | 45 M | 0.465 | 220.5 0 | 2 n | n | -0.07918 | 13 | 13 | 1 | -11.31 y   | n |
| 469 | POAG    | 61 M | 0.525 | 363 0   | 1 n | y | 1.39794  | 14 | 31 | 4 | -26.36 IOL | y |
| 470 | POAG    | 61 M | 0.485 | 258.5 0 | 2 y | y | -0.07918 | 11 | 19 | 3 | -18.97 IOL | y |
| 471 | EXG     | 91 M | 0.545 | 344.5 0 | 2 n | n | 0.154902 | 15 | 31 | 3 | -29.93 IOL | y |
| 473 | EXG     | 83 F | 0.53  | 272.5 0 | 0 y | n | 2        | 15 | 15 | 4 | -29.18 IOL | y |
| 474 | EXG     | 75 F | 0.46  | 298 0   | 2 y | n | -0.07918 | 11 | 24 | 2 | -26.66 IOL | y |
| 476 | POAG    | 59 F | 0.45  | 226.5 0 | 0 y | y | 0.09691  | 25 | 25 | 4 | -18.38 y   | n |
| 478 | POAG    | 72 F | 0.41  | 268.5 0 | 1 n | n | 0.09691  | 13 | 15 | 2 | -14.28 IOL | y |
| 479 | POAG    | 70 M | 0.42  | 267 0   | 2   |   | 0.69897  | 11 | 25 | 3 | -28.19 IOL | y |
| 480 | EXG     | 70 M | 0.575 | 115.5 0 | 1 y | y | 1.045757 | 4  | 29 | 0 | -23.41 IOL | y |
| 481 | POAG    | 59 M | 0.45  | 286 0   | 2 n | n | 0.30103  | 14 | 27 | 3 | -27.27 y   | y |
| 482 | EXG     | 71 F | 0.355 | 366 0   | 2 n | n | 0.39794  | 17 | 49 | 2 | -26.16 IOL | y |
| 483 | POAG    | 67 F | 0.44  | 369 0   | 3 n | n | -0.07918 | 23 | 23 | 3 | -2.22 y    | n |
| 484 | EXG     | 83 M | 0.435 | 334.5 0 | 2 y | n | 0.39794  | 18 | 18 | 4 | -4.51 IOL  | y |
| 485 | POAG    | 72 M | 0.495 | 342 0   | 3 n | y | 0.30103  | 23 | 23 | 4 | -22.76 IOL | y |
| 487 | POAG    | 71 F | 0.26  | 524 0   | 2 y | n | -0.07918 | 27 | 27 | 4 | -9.12 y    | n |
| 488 | POAG    | 80 F | 0.51  | 460.5 0 | 2 n | y | 0.39794  | 11 | 11 | 3 | -18.22 y   | n |
| 490 | POAG    | 73 M | 0.55  | 181.5 0 | 2 y | y | 0.045757 | 20 | 20 | 3 | -3.51 IOL  | y |
| 491 | POAG    | 66 F | 0.51  | 263 0   | 2 n | n | 0.69897  | 11 | 19 | 2 | -29.57 IOL | y |
| 492 | POAG    | 71 M | 0.63  | 268 0   | 1 y | n | -0.07918 | 15 | 26 | 3 | -11.34 IOL | y |
| 495 | EXG     | 65 F | 0.535 | 319.5 0 | 2 y | y | -0.07918 | 12 | 31 | 2 | -15.77 y   | n |

|     |         |      |       |            |     |   |          |    |    |   |            |   |
|-----|---------|------|-------|------------|-----|---|----------|----|----|---|------------|---|
| 498 | EXG     | 73 F | 0.47  | 333.5 0    | 1 y | y | 0.09691  | 19 | 37 | 2 | -19.7 IOL  | y |
| 502 | POAG    | 68 M | 0.495 | 647.5 0    | 2   |   | -0.07918 | 11 | 17 | 3 | -18.04 y   | n |
| 503 | POAG    | 60 F | 0.455 | 255 1      | 2 y |   | -0.07918 | 13 | 16 | 4 | -15.6 y    | n |
| 505 | POAG    | 68 F | 0.415 | 395.5 0    | 2   |   | 0        | 11 | 18 | 3 | -9.25 y    | n |
| 506 | EXG     | 67 M | 0.44  | 613.5 0    | 2 n | n | 0        | 23 | 23 | 4 | -3.18 y    | n |
| 507 | POAG    | 68 F | 0.415 | 369.5 0    | 2   |   | 0.154902 | 11 | 13 | 4 | -19.32 y   | n |
| 508 | POAG    | 65 M | 0.375 | 409.5 0    | 1 n | y | 0        | 14 | 14 | 3 | -16.73 y   | n |
| 511 | EXG     | 74 F | 0.525 | 648.5 0    | 3 y | n | 0        | 16 | 33 | 3 | -10.48 IOL | y |
| 512 | POAG    | 78 F | 0.455 | 254.5 0    | 3 y | n | 0.154902 | 12 | 12 | 3 | -25.3 IOL  | y |
| 513 | POAG    | 62 F | 0.37  | 551.5 0    | 3   |   | -0.07918 | 15 | 17 | 3 | -22.81 IOL | y |
| 515 | POAG    | 52 M | 0.385 | 348 0      | 3 n | n | 0.39794  | 17 | 17 | 3 | -19.5 IOL  | y |
| 516 | EXG     | 69 M | 0.41  | 313.5 0    | 3 n | n | 0.154902 | 17 | 17 | 4 | -11.01 y   | n |
| 517 | EXG     | 90 F | 0.505 | 413.5 0    | y   | n | 1        | 9  | 58 | 4 | -29.48 IOL | y |
| 519 | POAG    | 59 M | 0.43  | 355 1      | 2 y | n | 0.09691  | 14 | 25 | 3 | -19.23 IOL | y |
| 520 | EXG     | 75 F | 0.56  | 391 0      | 2   |   | -0.07918 | 12 | 23 | 2 | -0.96 y    | n |
| 521 | POAG    | 65 F | 0.41  | 266 0      | 1 n | n | -0.07918 | 11 | 11 | 4 | -10.64 IOL | y |
| 522 | EXG     | 63 M | 0.44  | 229.5 0    | 1   |   | -0.07918 | 13 | 28 | 3 | -3.32 IOL  | y |
| 523 | EXG     | 69 M | 0.385 | 215 0      | 2   |   | 0.221849 | 12 | 38 | 0 | -3.71 IOL  | y |
| 524 | control | 77 F | 0.465 | 372.5 0    | 2 n | n | 0.30103  |    |    | 0 | y          | n |
| 529 | EXG     | 67 M | 0.46  | 285 1      | 2   |   | 0        | 19 | 21 | 0 | -2.14 y    | n |
| 530 | POAG    | 48 F | 0.425 | 449.5 0    | 2   |   | -0.07918 | 11 | 22 | 4 | -17.97 y   | n |
| 531 | EXG     | 64 M | 0.375 | 291.5 0    | 2 n | n | 0.09691  | 16 | 37 | 3 | -28.26 IOL | y |
| 532 | POAG    | 77 M | 0.405 | 447.5 0    | 2 n | n | 0.09691  | 14 | 20 | 3 | -24.92 IOL | y |
| 533 | POAG    | 64 M | 0.46  | 242.5 0    | 2 n | n | -0.07918 | 17 | 21 | 3 | -20.14 IOL | y |
| 534 | POAG    | 65 M | 0.38  | 220 1      | 2 y |   | -0.07918 | 14 | 21 | 1 | -16.89 IOL | y |
| 536 | POAG    | 72 M | 0.5   | 192.5 1    | 2 y |   | 0.522879 | 9  | 30 | 3 | -28.52 IOL | y |
| 537 | control | 71 M | 0.435 | 130.5 1    | 2 n | n | 0.09691  |    |    | 0 | y          | n |
| 538 | EXG     | 73 M | 0.455 | 261 0      | 3   |   | -0.07918 | 25 | 27 | 1 | 1.25 IOL   | y |
| 540 | EXG     | 71 M | 0.205 | 538 1      | 2 y | n | -0.07918 | 23 | 23 | 5 | -13.76 y   | n |
| 541 | POAG    | 58 F | 0.405 | 320 0      | 2 y | y | -0.07918 | 14 | 16 | 3 | -26 y      | n |
| 544 | POAG    | 68 M | 0.44  | 347 0      | 2   |   | 0.69897  | 11 | 16 | 3 | -26.8 y    | y |
| 547 | EXG     | 72 M | 0.43  | 586.5 0    | 2 n | n | -0.17609 | 9  | 32 | 3 | -14.26 IOL | y |
| 548 | POAG    | 70 M | 0.495 | 186 0      | 2   |   | -0.07918 | 17 | 19 | 4 | -9.39 y    | n |
| 549 | POAG    | 63 M | 0.32  | 146.5 1    | 1 y |   | 0.045757 | 13 | 19 | 4 | -20.73 IOL | y |
| 550 | EXG     | 68 M | 0.545 | 196 1      | 3 y |   | -0.07918 | 19 | 29 | 0 | -1.02 y    | y |
| 551 | POAG    | 73 F | 0.44  | 256 0      | 3 y | n | 0        | 14 | 21 | 4 | -13.34 IOL | y |
| 554 | EXG     | 69 M | 0.55  | 386.5 0    | 1 n | n | -0.07918 | 13 | 46 | 1 | -30.23 IOL | y |
| 555 | EXG     | 84 F | 0.4   | 593.6667 0 | 2   |   | 0.39794  | 8  | 42 | 3 | -29.21 IOL | y |
| 556 | POAG    | 75 M | 0.455 | 495.5 1    | 0 y | n | 0.522879 | 15 | 21 | 4 | -19.14 IOL | y |
| 557 | EXG     | 67 M | 0.41  | 327 1      | 2   | y | -0.17609 | 11 | 51 | 0 | 1.11 IOL   | y |
| 560 | POAG    | 58 F | 0.445 | 236.5 0    | 2   |   | 0        | 11 | 17 | 1 | 0.13 IOL   | y |
| 561 | EXG     | 81 F | 0.395 | 316.5 0    | 2   |   | 0.39794  | 17 | 14 | 2 | -28.9 IOL  | y |
| 562 | POAG    | 77 M | 0.4   | 364.5 0    | 2   |   | 0        | 17 | 21 | 3 | -15.34 IOL | y |
| 563 | POAG    | 59 M | 0.47  | 270 0      | 3 y | n | -0.07918 | 11 | 20 | 3 | -14.8 y    | y |
| 565 | POAG    | 65 F | 0.565 | 356.5 0    | 2   |   | 0.221849 | 8  | 8  | 0 | -26.87 IOL | y |
| 572 | POAG    | 81 F | 0.52  | 401 0      | 3 y | n | 0        | 15 | 20 | 1 | -15.81 IOL | y |
| 573 | POAG    | 62 M | 0.37  | 378.5 0    | 3   |   | -0.07918 | 11 | 16 | 4 | -18.52 y   | n |
| 576 | control | 82 F | 0.49  | 418.5 0    | 2 y | y | 0.69897  |    |    | 0 | y          | n |
| 577 | POAG    | 70 M | 0.46  | 234 0      | 0   |   | -0.07918 | 11 | 23 | 3 | -10.1 y    | n |
| 583 | POAG    | 79 M | 0.52  | 257 0      | 2   | y | 0        | 13 | 22 | 2 | -10.01 IOL | y |
| 584 | POAG    | 60 M | 0.345 | 530 0      | 2   |   | -0.07918 | 19 | 22 | 4 | -24.21 IOL | y |
| 586 | POAG    | 72 F | 0.515 | 318.5 0    | 3 y |   | 0.154902 | 17 | 17 | 4 | -25.1 IOL  | y |
| 588 | POAG    | 76 M | 0.485 | 241 0      | 2 y |   | 0.221849 | 10 | 16 | 3 | -18.94 IOL | y |
| 589 | POAG    | 66 F | 0.535 | 417.5 0    | 2   | y | 0.522879 | 13 | 34 | 4 | -20.02 IOL | y |
| 590 | POAG    | 67 M | 0.4   | 204 0      | 1   |   | 0.09691  | 11 | 21 | 3 | -13.51 IOL | y |
| 592 | POAG    | 70 M | 0.34  | 163 1      | 1   |   | 0.30103  | 15 | 25 | 3 | -15.1 y    | n |
| 593 | POAG    | 74 F | 0.45  | 457 0      | 3   |   | 0.154902 | 6  | 25 | 0 | -28.6 IOL  | y |
| 595 | POAG    | 62 M | 0.395 | 300.5 0    | 1 y | n | 1        | 15 | 15 | 4 | -33.89 IOL | y |
| 596 | POAG    | 41 F | 0.32  | 290 0      | 3   |   | -0.07918 | 17 | 45 | 0 | -3.87 y    | n |
| 597 | POAG    | 61 M | 0.435 | 210 1      | 0   |   | 0.39794  | 13 | 30 | 4 | -31.14 IOL | y |
| 599 | POAG    | 84 F | 0.455 | 347 0      | 3 y | y | 0.045757 | 17 | 25 | 2 | -8.66 IOL  | y |
| 600 | POAG    | 66 M | 0.475 | 317.5 0    | 1 y | n | -0.07918 | 15 | 24 | 3 | -6.79 IOL  | y |
| 602 | POAG    | 71 M | 0.495 | 236.5 1    | 1   |   | -0.07918 | 11 | 18 | 2 | -19.97 y   | n |
| 603 | POAG    | 77 M | 0.43  | 573 0      | 3   |   | 0        | 16 | 29 | 4 | -18.5 IOL  | y |
| 606 | EXG     | 82 F | 0.475 | 290.5 0    | 2   |   | 0.39794  | 9  | 44 | 0 | -28.74 IOL | y |
| 608 | POAG    | 61 M | 0.45  | 378.5 0    | 2 n | n | -0.07918 | 9  | 17 | 4 | -23.85 IOL | y |
| 609 | POAG    | 48 F | 0.32  | 206 1      | 0   |   | 0        | 15 | 21 | 3 | -6.08 y    | y |
| 611 | POAG    | 67 M | 0.365 | 257 0      | 0 n | n | 0.09691  | 14 | 19 | 3 | -19.73 IOL | y |
| 612 | POAG    | 71 M | 0.345 | 349.5 0    | 2   | y | 0        | 13 | 34 | 4 | -7.07 IOL  | y |
| 613 | POAG    | 63 F | 0.44  | 363.5 0    | 3   |   | 1.09691  | 10 | 51 | 0 | -18.18 y   | y |
| 619 | POAG    | 77 F | 0.4   | 115.5 0    | 2 y | n | 0.09691  | 13 | 13 | 2 | -6.65 IOL  | y |
| 620 | EXG     | 83 M | 0.525 | 316.5 0    | 2 n | n | 0.30103  | 14 | 14 | 5 | -17.32 y   | n |
| 621 | EXG     | 82 M | 0.53  | 168 0      | 1 y | n | 0.30103  | 21 | 21 | 4 | -29.91 IOL | y |
| 622 | POAG    | 77 F | 0.395 | 283 0      | 2   |   | 0        | 12 | 12 | 2 | -7.1 y     | n |
| 624 | POAG    | 52 M | 0.415 | 292 0      | 2   |   | 0        | 14 | 15 | 4 | -24.1 y    | n |
| 625 | POAG    | 58 M | 0.64  | 181.5 0    | 2 n | n | -0.07918 | 14 | 18 | 4 | -12.76 y   | y |
| 628 | EXG     | 69 M | 0.28  | 321.5 1    | 3   | y | 0.154902 | 15 | 41 | 3 | -28.04 IOL | y |
| 629 | POAG    | 61 F | 0.48  | 502.5 0    | 2   |   | -0.07918 | 11 | 45 | 0 | -8.86 y    | y |
| 630 | POAG    | 59 M | 0.455 | 347.5 0    | 3   |   | -0.07918 | 14 | 47 | 0 | -19.76 y   | n |
| 631 | POAG    | 50 M | 0.495 | 428.5 0    | 3 n | n | -0.07918 | 19 | 23 | 4 | -9.59 y    | y |
| 632 | POAG    | 84 M | 0.455 | 132 0      | 3 y | n | 0.221849 | 11 | 15 | 3 | -23.57 IOL | y |
| 633 | POAG    | 55 F | 0.415 | 340 0      | 3 y | n | 0.09691  | 13 | 19 | 1 | -18.25 y   | y |
| 634 | POAG    | 78 F | 0.355 | 671 0      | 3 y | n | -0.07918 | 12 | 17 | 3 | -10.16 IOL | y |
| 639 | control | 83 F | 0.525 | 446 0      | 1   |   | 0.30103  | 18 | 18 | 0 | y          | n |
| 643 | POAG    | 78 M | 0.375 | 575 0      | 2 n | y | 0        | 10 | 24 | 2 | -13.34 IOL | y |
| 645 | POAG    | 57 M | 0.52  | 230.5 1    | 2 n | n | -0.07918 | 19 | 19 | 4 | -22.49 y   | n |
| 646 | POAG    | 81 M | 0.455 | 481 0      | 3   |   | 0.09691  | 12 | 18 | 0 | -9.73 IOL  | y |
| 650 | POAG    | 52 M | 0.385 | 302.5 0    | 2   |   | -0.07918 | 9  | 15 | 3 | -13.82 y   | n |
| 652 | POAG    | 88 M | 0.39  | 238 0      | 2 y | n | 0.154902 | 9  | 19 | 2 | -20.27 IOL | y |
| 655 | POAG    | 70 M | 0.335 | 511.5 0    | 2   |   | 0.221849 | 11 | 18 | 3 | -7.72 IOL  | y |
| 664 | POAG    | 76 M | 0.4   | 284.5 0    | 2   | y | -0.07918 | 17 | 19 | 1 | -16.47 IOL | y |
| 665 | EXG     | 85 F | 0.545 | 337.5 0    | 3 y | n | 0        | 9  | 24 | 2 | -7.08 IOL  | y |
| 667 | EXG     | 85 M | 0.48  | 85 0       | 1 y | n | 0.154902 | 19 | 19 | 3 | -19.2 y    | n |
| 668 | POAG    | 57 M | 0.57  | 230 0      | 2   |   | 1.39794  | 12 | 23 | 4 | -31.01 y   | y |
| 669 | POAG    | 67 M | 0.29  | 273 1      | 1 n | n | 0.09691  | 15 | 15 | 2 | -5.42 IOL  | y |
| 672 | EXG     | 85 M | 0.53  | 220.5 0    | 2 y | n | 2        | 35 | 35 | 2 | -30.47 IOL | y |
| 673 | EXG     | 80 F | 0.39  | 554 0      | 2 n | n | -0.20412 | 21 | 21 | 1 | -12.24 IOL | y |

|     |         |      |       |         |     |   |          |    |    |   |            |   |
|-----|---------|------|-------|---------|-----|---|----------|----|----|---|------------|---|
| 674 | POAG    | 65 F | 0.515 | 355.5 0 | 3 y |   | 0        | 15 | 40 | 0 | -15.24 IOL | y |
| 676 | control | 70 F | 0.395 | 224.5 0 | 3 y | n | 0.045757 |    |    | 0 | y          | n |
| 681 | EXG     | 92 F | 0.545 | 183.5 0 | 2   |   | 0.30103  | 11 | 27 | 4 | -28.64 IOL | y |
| 682 | EXG     | 64 M | 0.49  | 281.5 0 | 1 n | n | 0.522879 | 14 | 25 | 2 | -22.35 IOL | y |
| 683 | control | 78 F | 0.4   | 258.5 0 | 2 y | n | 1        | 13 | 13 | 0 | y          | n |
| 684 | EXG     | 82 F | 0.505 | 410.5 0 | 2   |   | 0.522879 | 8  | 30 | 3 | -15.41 IOL | y |
| 687 | POAG    | 50 F | 0.33  | 392 1   | 3   |   | -0.07918 | 17 | 20 | 3 | -12.14 y   | n |
| 688 | POAG    | 56 M | 0.4   | 202 0   | 2 n | y | -0.07918 | 11 | 15 | 2 | -2.55 y    | n |
| 690 | POAG    | 69 M | 0.31  | 147 1   | 2   |   | 0        | 8  | 21 | 4 | -29.84 IOL | y |
| 693 | POAG    | 81 F | 0.45  | 497 0   | 3 y | n | 0.045757 | 12 | 16 | 2 | -10.51 IOL | y |
| 696 | POAG    | 81 M | 0.54  | 166.5 0 | 2   | y | 0        | 11 | 20 | 3 | -15.01 IOL | y |
| 697 | POAG    | 66 M | 0.475 | 139 0   | 1 y | n | -0.07918 | 20 | 20 | 4 | -19.26 IOL | y |
| 698 | EXG     | 76 M | 0.545 | 288.5 0 | 3 n | n | 0        | 10 | 27 | 3 | -5.23 IOL  | y |
| 702 | POAG    | 73 F | 0.495 | 372.5 0 | 3   |   | 0        | 15 | 19 | 2 | -1.08 y    | n |
| 703 | POAG    | 71 F | 0.325 | 334.5 0 | 2   |   | 0.045757 | 14 | 19 | 1 | -10.62 IOL | y |
| 704 | EXG     | 87 M | 0.54  | 301 0   | 2   |   | 0.221849 | 27 | 32 | 3 | -29.52 IOL | y |
| 705 | POAG    | 66 M | 0.405 | 445.5 0 | 2   |   | 0        | 10 | 12 | 3 | -7.66 y    | n |
| 711 | POAG    | 55 F | 0.45  | 635 0   | 3   |   | -0.07918 | 13 | 20 | 2 | -0.94 y    | n |
| 713 | EXG     | 77 F | 0.5   | 331.5 0 | 2 y |   | -0.07918 | 7  | 55 | 2 | -12.58 IOL | y |
| 718 | POAG    | 70 M | 0.445 | 213 0   | 1 y |   | -0.07918 | 13 | 22 | 3 | -24.43 IOL | y |
| 719 | POAG    | 71 M | 0.45  | 484 0   | 3   |   | -0.07918 | 15 | 21 | 1 | -3 y       | n |
| 723 | control | 77 F | 0.535 | 222.5 0 | 1   |   | 0.39794  | 11 | 11 | 0 | y          | n |
| 724 | control | 79 M | 0.485 | 400 0   | 2   |   | 0.09691  | 13 | 13 | 0 | y          | n |
| 729 | control | 80 M | 0.43  | 252.5 0 | 1 y | n | 0.154902 | 14 | 14 | 0 | y          | n |
| 736 | POAG    | 33 F | 0.475 | 408 0   | 0 n | n | -0.07918 | 17 | 17 | 0 | -3.15 y    | n |
| 738 | POAG    | 61 M | 0.455 | 465.5 0 | 2 y | n | 0.045757 | 13 | 13 | 4 | -10.16 y   | n |
| 739 | POAG    | 72 M | 0.425 | 312.5 0 | 2 y |   | 0.221849 | 5  | 16 | 0 | -27.38 IOL | y |
| 740 | EXG     | 64 M | 0.46  | 287 0   | 2 y | n | -0.07918 | 27 | 27 | 0 | -2.37 y    | n |
| 741 | POAG    | 51 F | 0.5   | 262.5 0 | 2   |   | -0.07918 | 12 | 18 | 3 | -13.85 y   | y |
| 743 | POAG    | 79 M | 0.42  | 349 0   | 2 y |   | 0.522879 | 19 | 19 | 4 | -21.95 IOL | y |
| 748 | POAG    | 43 M | 0.45  | 534 0   | 2 n | n | -0.07918 | 11 | 14 | 1 | -3.8 y     | n |
| 749 | control | 78 F | 0.485 | 434.5 0 | 3   |   | 0.045757 | 12 | 12 | 0 | y          | n |
| 750 | control | 71 F | 0.485 | 297.5 0 | 2   |   | 0.09691  | 14 | 14 | 0 | y          | n |
| 751 | control | 78 F | 0.36  | 445 0   | 3 y | y | 0.045757 | 14 | 14 | 0 | y          | n |
| 756 | control | 77 M | 0.515 | 434 0   | 2 y | y | 0.09691  | 16 | 16 | 0 | y          | n |
| 757 | control | 88 F | 0.495 | 349.5 0 | 2 y | n | 0.39794  | 16 | 16 | 0 | y          | n |
| 758 | EXG     | 69 F | 0.63  | 330 0   | 2 n | n | -0.07918 | 15 | 20 | 3 | -12.92 IOL | y |
| 759 | EXG     | 72 M | 0.44  | 235.5 0 | 2   |   | -0.07918 | 15 | 28 | 0 | -12.82 IOL | y |
| 760 | POAG    | 51 F | 0.49  | 287 0   | 2   |   | -0.07918 | 11 | 22 | 3 | -12.51 y   | y |
| 762 | POAG    | 61 F | 0.505 | 344.5 1 | 2   |   | -0.07918 | 12 | 17 | 3 | -16.6 y    | n |
| 766 | POAG    | 72 M | 0.53  | 235 0   | 1 y | n | -0.07918 | 14 | 17 | 3 | -9.51 IOL  | y |
| 769 | control | 81 F | 0.335 | 308.5 0 | 2 n | n | 0.30103  |    |    | 0 | IOL        | y |
| 772 | EXG     | 76 M | 0.36  | 291.5 0 | 1   | y | 0.09691  | 10 | 59 | 3 | -25.64 IOL | y |
| 773 | control | 84 M | 0.53  | 170 0   | 1 n | n | 0.154902 |    |    | 0 | y          | n |
| 775 | POAG    | 67 M | 0.345 | 157.5 1 | 2 y | y | 0.045757 | 8  | 10 | 4 | -26.68 IOL | y |
| 776 | POAG    | 69 M | 0.32  | 370.5 0 | 2   |   | 0.221849 | 11 | 15 | 2 | -4.47 y    | n |
| 778 | EXG     | 49 M | 0.375 | 258.5 1 | 0 n | n | -0.07918 | 15 | 15 | 1 | -3.18 y    | n |
| 779 | EXG     | 71 M | 0.41  | 482.5 0 | 2 y | y | 0.823909 | 9  | 30 | 3 | -30.58 IOL | y |
| 781 | POAG    | 59 M | 0.47  | 327.5 0 | 3   |   | 0.09691  | 12 | 21 | 3 | -19.84 IOL | y |
| 783 | POAG    | 73 F | 0.405 | 447.5 0 | 3   | y | 0.154902 | 11 | 17 | 1 | -23.95 IOL | y |
| 784 | control | 53 F | 0.3   | 428 0   | 2   | y | 0.09691  | 18 | 18 | 0 | y          | n |
| 785 | EXG     | 83 F | 0.565 | 274.5 0 | 2 y | n | 0.221849 | 11 | 20 | 3 | -30.43 IOL | y |
| 787 | POAG    | 71 M | 0.395 | 318 0   | 2 n | n | 0.823909 | 10 | 10 | 1 | -8.45 y    | n |
| 788 | control | 81 M | 0.595 | 364.5 0 | 3   |   | 0.221849 |    |    | 0 | y          | n |
| 791 | POAG    | 69 M | 0.35  | 188 1   | 2 y | n | 0.045757 | 5  | 13 | 0 | -16.65 y   | y |
| 795 | POAG    | 66 F | 0.43  | 287.5 0 | 2 n | n | -0.07918 | 16 | 22 | 3 | -8.5 IOL   | y |
| 796 | EXG     | 81 F | 0.415 | 448 0   | 2 y | n | -0.07918 | 11 | 20 | 3 | -19.28 IOL | y |
| 798 | control | 64 M | 0.52  | 161.5 0 | 1   |   | -0.07918 | 12 | 12 | 0 | y          | n |
| 799 | control | 70 M | 0.5   | 309 0   | 2 y | n | 0.30103  | 20 | 20 | 0 | y          | n |
| 800 | control | 69 M | 0.42  | 239.5 1 | 2   |   | 0.154902 | 18 | 18 | 0 | y          | n |
| 802 | POAG    | 82 F | 0.345 | 116.5 0 | 1   |   | 0.09691  | 11 | 17 | 3 | -29.3 IOL  | y |
| 808 | control | 83 M | 0.6   | 220 0   | 1 y | y | 0.39794  |    |    | 0 | y          | n |
| 810 | control | 70 F | 0.41  | 237.5 0 | 2 n | n | 0.154902 | 13 | 13 | 0 | -1.64 y    | n |
| 812 | control | 69 M | 0.42  | 320.5 0 | 2 n | n | 0.154902 |    |    | 0 | y          | n |
| 815 | POAG    | 57 M | 0.385 | 249.5 0 | 1 n | n | -0.07918 | 7  | 9  | 0 | -13.39 y   | n |
| 816 | POAG    | 74 M | 0.445 | 278 0   | 3   |   | 0.522879 | 11 | 18 | 5 | -30.22 IOL | y |
| 818 | POAG    | 80 F | 0.385 | 449 0   | 3 y | y | 0.39794  | 13 | 24 | 2 | -24.87 IOL | y |
| 819 | POAG    | 51 M | 0.37  | 194.5 1 | 3 y | n | -0.07918 | 11 | 18 | 5 | -13.64 y   | n |
| 823 | control | 70 M | 0.33  | 164 0   |     |   | 0.69897  |    |    | 0 | y          | n |
| 824 | POAG    | 49 F | 0.38  | 378.5 0 | 2   |   | -0.07918 | 11 | 17 | 4 | -21.29 y   | n |
| 826 | EXG     | 78 M | 0.58  | 306 0   | 2 y | n | -0.07918 | 11 | 17 | 3 | -0.45 IOL  | y |
| 827 | POAG    | 74 F | 0.475 | 453.5 0 | 2 n | n | 1        | 17 | 18 | 3 | -13.26 IOL | y |
| 829 | control | 76 M | 0.38  | 376 0   | 0   |   | 0.09691  |    | 23 | 0 | y          | n |
| 831 | POAG    | 82 F | 0.54  | 315 0   | 1 y | n | -0.07918 | 14 | 17 | 2 | -12.01 IOL | y |
| 833 | POAG    | 83 F | 0.42  | 422 0   | 2 y | y | 0        | 11 | 22 | 2 | -28.94 IOL | y |
| 839 | POAG    | 77 M | 0.74  | 452.5 0 | 2   |   | 0.09691  | 13 | 17 | 4 | -22.3 IOL  | y |
| 845 | POAG    | 82 F | 0.315 | 240 0   | 3 y | y | 0.045757 | 13 | 27 | 2 | -25.56 IOL | y |
| 847 | POAG    | 79 F | 0.41  | 541 0   | 2 y | n | 0        | 16 | 22 | 4 | -15.9 y    | n |
| 849 | POAG    | 67 M | 0.42  | 223.5 1 | 2 y | n | 0.221849 | 15 | 15 | 2 | -15.06 y   | n |
| 850 | POAG    | 49 F | 0.38  | 275 0   | 2 n | n | -0.07918 | 20 | 20 | 0 | -1.64 y    | n |
| 852 | POAG    | 73 M | 0.44  | 774 0   | 3 y |   | 0.045757 | 14 | 19 | 3 | -10.29 y   | y |
| 853 | POAG    | 52 F | 0.285 | 281 1   | 2 n | n | -0.07918 | 21 | 21 | 4 | -8.77 y    | n |
| 854 | POAG    | 69 F | 0.44  | 415 0   | 3 n | n | 0.30103  | 20 | 20 | 4 | -9.73 y    | n |
| 855 | EXG     | 77 M | 0.49  | 417 0   | 3 y | n | 1.69897  | 14 | 14 | 4 | -26.98 y   | n |
| 858 | control | 51 M | 0.495 | 264.5 0 | 2 n | n | -0.07918 | 20 | 20 | 0 | y          | n |
| 859 | control | 74 F | 0.325 | 502.5 0 | 3   |   | -0.07918 |    |    | 0 | y          | n |
| 861 | control | 73 F | 0.3   | 139.5 0 | 1 y | n | 0.045757 |    |    | 0 | y          | n |
| 863 | control | 61 F | 0.365 | 233.5 0 | 2 n | n | 0.522879 | 12 | 12 | 0 | y          | n |
| 864 | POAG    | 47 M | 0.435 | 206.5 1 | 2   |   | -0.07918 | 13 | 23 | 3 | -3.7 y     | y |
| 866 | EXG     | 60 M | 0.47  | 181.5 0 | 1 y |   | 0.522879 | 9  | 51 | 2 | -18.62 IOL | y |
| 868 | POAG    | 66 M | 0.48  | 387 0   | 2 y | n | 0.09691  | 16 | 39 | 2 | -11.64 y   | n |
| 869 | control | 75 M | 0.43  | 255.5 0 | 3 n | y | 0.154902 | 14 | 14 | 0 | y          | n |
| 872 | POAG    | 69 M | 0.37  | 959.5 0 | 2 y | y | 1.30103  | 14 | 23 | 3 | -29.86 y   | n |
| 873 | POAG    | 70 F | 0.405 | 329.5 0 | 3   |   | 0.154902 | 9  | 16 | 2 | -26.07 IOL | y |
| 874 | EXG     | 86 M | 0.395 | 199.5 1 | 2 n | n | 0.69897  | 13 | 13 | 0 | -5.68 y    | n |
| 875 | EXG     | 72 F | 0.455 | 398.5 0 | 3 n | n | -0.07918 | 39 | 39 | 4 | -3.71 IOL  | y |
| 878 | POAG    | 75 F | 0.37  | 339.5 0 | 3   |   | 0.09691  | 19 | 19 | 3 | -0.11 IOL  | y |

|      |         |      |          |         |     |   |          |    |    |   |            |   |
|------|---------|------|----------|---------|-----|---|----------|----|----|---|------------|---|
| 879  | control | 81 F | 0.455    | 293 0   | 2   | y | 0.30103  | 12 | 12 | 0 | y          | n |
| 881  | EXG     | 82 M | 0.645    | 407.5 0 | 2   | y | 1        | 6  | 28 | 0 | -24.35 IOL | y |
| 882  | control | 58 M | 0.445    | 231.5 1 | 1   | y | 0.221849 | 18 | 18 | 0 | y          | n |
| 883  | control | 69 M | 0.27     | 182 1   | 1   | y | 0.154902 | 18 | 18 | 0 | y          | n |
| 885  | control | 74 F | 0.435    | 175.5 0 | 0 n | n | 0.39794  |    |    | 0 | y          | n |
| 891  | POAG    | 57 F | 0.38     | 300 0   | 2 y | n | -0.07918 | 12 | 23 | 3 | 0.79 y     | y |
| 892  | POAG    | 58 M | 0.43     | 378.5 0 | 2 y | y | -0.07918 | 8  | 21 | 0 | -12.93 y   | y |
| 896  | POAG    | 64 F | 0.455    | 428 0   | 2 n | n | 0.39794  | 9  | 19 | 0 | -11.25 y   | y |
| 897  | control | 92 F | 0.47     | 439 0   | 3   |   | 0.39794  | 10 | 10 | 0 | IOL        | y |
| 899  | POAG    | 71 M | 0.48     | 324 0   | 2 y | n | 1.69897  | 20 | 20 | 0 | -7.85 y    | n |
| 900  | POAG    | 58 M | 0.425    | 388.5 0 | 2 y | n | 0.30103  | 13 | 14 | 2 | -9.22 y    | n |
| 902  | POAG    | 54 M | 0.435    | 367.5 0 | 2   |   | 0.045757 | 10 | 18 | 3 | -14.33 y   | n |
| 903  | POAG    | 51 M | 0.36     | 662 0   | 3   |   | -0.07918 | 12 | 19 | 4 | -6.54 y    | n |
| 904  | POAG    | 63 M | 0.41     | 725 0   | 3 y | y | 0        | 14 | 14 | 3 | -10.77 y   | n |
| 906  | POAG    | 65 M | 0.375    | 544 0   | 2 n | n | -0.07918 | 11 | 11 | 3 | -6.72 y    | n |
| 908  | EXG     | 77 F | 0.56     | 281.5 0 | 2   | y | 2.60206  | 16 | 16 | 4 | -29.64 y   | n |
| 909  | POAG    | 56 F | 0.425    | 249 0   | 0 n | n | -0.07918 | 14 | 20 | 4 | -5.52 y    | n |
| 914  | POAG    | 56 M | 0.425    | 295 0   | 1 n | n | 0.522879 | 16 | 31 | 3 | -24.21 y   | y |
| 915  | POAG    | 53 F | 0.385    | 377.5 0 | 2   |   | -0.07918 | 14 | 16 | 2 | -1.35 y    | n |
| 919  | POAG    | 73 M | 0.515    | 274.5 0 | 2 y |   | 0        | 9  | 17 | 4 | -18.61 y   | y |
| 923  | control | 71 F | 0.365    | 315 0   | 2 n | n | 0.154902 | 17 | 17 | 0 | y          | n |
| 924  | POAG    | 50 F | 0.45     | 324 0   | 2 n | n | -0.07918 | 20 | 23 | 0 | -4.43 y    | n |
| 925  | POAG    | 76 M | 0.52     | 250.5 0 | 1   |   | -0.07918 | 7  | 12 | 3 | -20 IOL    | y |
| 926  | POAG    | 52 F | 0.595    | 316.5 0 | 1 n | n | 0.522879 | 11 | 11 | 0 | -3.94 y    | n |
| 927  | POAG    | 78 F | 0.48     | 279.5 0 | 3   |   | 0.045757 | 12 | 19 | 2 | -19.4 IOL  | y |
| 931  | control | 73 M | 0.375    | 279.5 0 | 1   |   | 0.221849 |    |    | 0 | y          | n |
| 938  | EXG     | 86 F | 0.64     | 233.5 0 | 1 y |   | 0.154902 | 12 | 14 | 1 | -17.5 y    | n |
| 941  | control | 90 M | 0.515    | 305 0   | 2 n | y | 0.522879 |    |    | 0 | y          | n |
| 943  | control | 59 M | 0.415    | 140.5 0 | n   | n | 0.221849 |    |    | 0 | y          | n |
| 946  | POAG    | 68 M | 0.53     | 278.5 0 | 2 y | n | 0.39794  | 12 | 16 | 1 | -7.61 y    | n |
| 947  | control | 80 F | 0.5      | 198 0   | 3 y | n | 0.154902 | 14 | 14 | 0 | y          | n |
| 948  | POAG    | 58 M | 0.64     | 181.5 0 | 2 n | n | 0        | 16 | 21 | 4 | -12.76 y   | y |
| 952  | POAG    | 55 M | 0.445    | 254 1   | 0 n | n | -0.07918 | 25 | 25 | 0 | -6.12 y    | n |
| 954  | control | 68 M | 0.35     | 247 0   | 2 y | n | 0.154902 | 14 | 14 | 0 | y          | n |
| 955  | control | 92 M | 0.315    | 389.5 0 | 2   |   | 1.221849 | 16 | 16 | 0 | y          | n |
| 962  | POAG    | 65 M | 0.62     | 241 0   | 2 n | y | 0.522879 | 11 | 11 | 3 | -28.31 y   | n |
| 964  | control | 80 M | 0.49     | 401.5 0 | 2 y | n | 0.221849 |    |    | 0 | y          | n |
| 965  | control | 70 F | 0.43     | 316.5 0 | 1 y |   | 0.221849 |    |    | 0 | y          | n |
| 967  | control | 75 M | 0.53     | 333 0   | 0 y | n | 0.221849 | 14 | 14 | 0 | y          | n |
| 968  | control | 68 M | 0.38     | 339.5 1 | 1 y | y | 0.221849 | 11 | 11 | 0 | y          | n |
| 969  | control | 85 F | 0.475    | 153.5 0 | 2 y | n | 0.39794  |    |    | 0 | y          | n |
| 971  | POAG    | 76 M | 0.34     | 373.5 0 | 1 n | n | 0.154902 | 11 | 24 | 3 | -19.17 IOL | y |
| 972  | POAG    | 56 F | 0.375    | 513 0   | 2   |   | -0.07918 | 13 | 18 | 4 | -10.35 IOL | y |
| 977  | control | 74 F | 0.455    | 371.5 0 | 3 n | n | 0.221849 |    |    | 0 | y          | n |
| 983  | POAG    | 50 M | 0.465    | 279.5 0 | 2 n | n | -0.07918 | 15 | 15 | 1 | -10.11 y   | n |
| 991  | control | 70 M | 0.43     | 252.5 0 | 2 n | n | 0.221849 | 10 | 10 | 0 | y          | n |
| 997  | control | 82 M | 0.425    | 246.5 0 | 1 n | n | 0.154902 |    |    | 0 | y          | n |
| 998  | POAG    | 65 F | 0.275    | 285 1   | 0 n | n | -0.07918 |    | 16 | 1 | -5.89 y    | n |
| 1000 | POAG    | 43 F | 0.43     | 501.5 0 | 2   |   | -0.07918 | 15 | 23 | 4 | -13.29 y   | y |
| 1003 | EXG     | 83 F | 0.51     | 269 0   | 2 n | n | 0        | 12 | 12 | 5 | -16.59 IOL | y |
| 1004 | control | 81 M | 0.49     | 269 0   | 2 n | n | 0.09691  | 17 | 17 | 0 | -7.19 y    | n |
| 1007 | POAG    | 84 F | 0.435    | 299 0   | 3 y | n | 1        | 12 | 31 | 4 | -27.74 IOL | y |
| 1010 | EXG     | 85 M | 0.48     | 427.5 0 | 2 y | n | 0.69897  | 10 | 10 | 4 | -32.97 IOL | y |
| 1011 | EXG     | 65 F | 0.55     | 203.5 0 | 2 y | n | -0.07918 | 16 | 33 | 3 | -24.12 IOL | y |
| 1017 | control | 67 F | 0.475    | 293.5 0 | 3 n | n | 0.30103  |    |    | 0 | y          | n |
| 1027 | control | 78 M | 0.425    | 190.5 1 | 2 n | n | 0.30103  | 12 | 12 | 0 | y          | n |
| 1028 | POAG    | 45 M | 0.39     | 332.5 0 | 2 n | n | -0.07918 | 11 | 11 | 2 | -10.06 y   | n |
| 1030 | EXG     | 66 M | 0.4      | 236.5 1 | 1 y | y | -0.07918 | 15 | 15 | 3 | -5.08 IOL  | y |
| 1033 | POAG    | 56 F | 0.475    | 209.5 0 | 1   |   | -0.07918 | 9  | 17 | 0 | -12.7 y    | n |
| 1034 | POAG    | 78 F | 0.39     | 429.5 0 | 3 y | n | 0.221849 | 9  | 9  | 2 | -6.08 y    | n |
| 1035 | control | 67 M | 0.345    | 242 0   | 1   |   | 0        |    |    | 0 | y          | n |
| 1038 | control | 80 F | 0.445    | 364 0   | 2   |   | 0.221849 |    |    | 0 | y          | n |
| 1039 | control | 85 M | 0.515    | 139.5 0 | 2   | n | 0.30103  |    |    | 0 | y          | n |
| 1040 | control | 60 F | 0.475    | 368.5 0 | 2 n | n | -0.07918 |    |    | 0 | y          | n |
| 1041 | control | 64 F | 0.39     | 377.5 0 | 2   |   | -0.07918 | 14 | 14 | 0 | y          | n |
| 1043 | EXG     | 86 M | 0.55     | 237.5 0 | 1   |   | 2.60206  | 26 | 40 | 4 | -29.5 IOL  | y |
| 1052 | control | 82 M | 0.46     | 372.5 0 | 1 n | y | 0.045757 | 14 | 14 | 0 | y          | n |
| 1055 | control | 80 M | 0.355    | 133.5 1 | 2 y | n | 0        | 16 | 16 | 0 | y          | n |
| 1056 | control | 81 M | 0.35     | 345 0   | 2 y | n | 0.09691  | 14 | 14 | 0 | y          | n |
| 1059 | POAG    | 55 F | 0.44     | 271 0   | 1 n | n | -0.07918 | 13 | 14 | 3 | -4.17 y    | n |
| 1060 | POAG    | 70 F | 0.305    | 266.5 0 | 2 n | n | 0.30103  | 17 | 17 | 2 | -12.94 y   | n |
| 1061 | EXG     | 80 F | 0.485    | 256.5 0 | 1 n | n | 0.39794  | 9  | 9  | 1 | -6.57 y    | n |
| 1062 | EXG     | 77 F | 0.49     | 292 0   | 2 y | n | 0.045757 | 14 | 21 | 3 | -14.96 IOL | y |
| 1063 | POAG    | 72 M | 0.475    | 280 0   | 2 n | n | 0        | 31 | 31 | 4 | -8.1 IOL   | y |
| 1065 | control | 73 F | 0.31     | 525.5 0 | 2   |   | 0        |    |    | 0 | y          | n |
| 1068 | POAG    | 69 M | 0.48     | 302.5 0 | 2 n | n | 0        | 15 | 15 | 4 | -15.52 y   | n |
| 1072 | POAG    | 71 M | 0.495    | 236.5 1 | 1   |   | -0.07918 | 11 | 22 | 2 | -19.97 y   | n |
| 1075 | EXG     | 66 M | 0.44     | 235 0   | 2 y | n | -0.07918 | 15 | 24 | 1 | -0.6 IOL   | y |
| 1086 | POAG    | 60 M | 0.465    | 276 0   | 3 y | n | -0.07918 | 20 | 20 | 4 | -4.17 y    | n |
| 1087 | POAG    | 59 M | 0.455    | 216 0   | 2 n | n | 0.30103  | 13 | 23 | 3 | -9.79 IOL  | y |
| 1091 | EXG     | 66 M | 0.295    | 200.5 1 | 0 y | n | 0.823909 | 32 | 30 | 4 | -9.21 IOL  | y |
| 1092 | POAG    | 68 F | 0.43     | 288.5 0 | 2 n | n | 0.69897  | 13 | 13 | 5 | -17.28 IOL | y |
| 1093 | EXG     | 70 M | 0.47     | 290 0   | 2 y | n | 0.09691  | 13 | 25 | 4 | -26.02 IOL | y |
| 1094 | POAG    | 64 F | 0.345    | 292.5 1 | 1 n | n | -0.07918 | 16 | 16 | 2 | -6.98 IOL  | y |
| 1101 | control | 71 M | 0.28     | 579.5 0 | 3 n | n | -0.07918 | 15 | 15 | 0 | y          | n |
| 1102 | control | 83 F | 0.53     | 242.5 0 | 2   |   | 0.522879 |    |    | 0 | IOL        | y |
| 1104 | POAG    | 75 M | 0.335    | 404 0   | 3   |   | -0.07918 | 16 | 27 | 3 | -4.85 IOL  | y |
| 1105 | POAG    | 73 M | 0.49     | 249 0   | 2   |   | 0.221849 | 8  | 27 | 2 | -28.75 IOL | y |
| 1106 | POAG    | 73 F | 0.326667 | 347.5 0 | 3   |   | 0        | 9  | 46 | 3 | -4.75 IOL  | y |
| 1107 | control | 61 M | 0.43     | 337 0   | 3   |   | -0.07918 | 14 | 14 | 0 | y          | n |
| 1108 | EXG     | 70 M | 0.416667 | 162 0   | 1 y |   | 0.522879 | 10 | 25 | 0 | -30.54 IOL | y |
| 1109 | control | 79 M | 0.46     | 513 0   | 3 n | n | -0.07918 | 12 | 12 | 0 | IOL        | y |
| 1110 | control | 79 F | 0.42     | 323 0   | 2 y | n | 0.522879 | 14 | 14 | 0 | y          | n |
| 1113 | control | 71 M | 0.445    | 237 0   | 2 y | n | 0.045757 | 17 | 17 | 0 | y          | n |
| 1119 | POAG    | 62 M | 0.455    | 267 0   | 3 y | n | 0.90309  | 9  | 12 | 1 | -22.68 y   | y |
| 1124 | POAG    | 68 M | 0.77     | 339.5 0 | 3 y | n | 0.30103  | 25 | 25 | 4 | -30.03 y   | n |
| 1125 | POAG    | 34 F | 0.34     | 263.5 1 | 3 n | n | -0.07918 | 13 | 13 | 4 | -28.44 y   | n |

|      |         |      |          |            |     |   |          |    |    |   |            |   |
|------|---------|------|----------|------------|-----|---|----------|----|----|---|------------|---|
| 1126 | POAG    | 64 F | 0.37     | 562.5 0    | 2   |   | 0.045757 | 15 | 17 | 4 | -12.31 y   | y |
| 1128 | control | 27 M | 0.42     | 351.5 0    | 2 n | n | -0.07918 | 19 | 19 | 0 | -3 y       | n |
| 1130 | POAG    | 70 F | 0.465    | 169 0      | 1   |   | 2        | 10 | 19 | 4 | -33.95 IOL | y |
| 1131 | POAG    | 69 M | 0.375    | 218 0      | 2 y | n | 0.69897  | 15 | 15 | 5 | -20.19 IOL | y |
| 1135 | control | 75 M | 0.555    | 294.5 0    | 2 n | y | 0.09691  | 20 | 20 | 0 | y          | n |
| 1136 | control | 68 F | 0.365    | 291.5 0    | 1   |   | -0.07918 |    |    | 0 | IOL        | y |
| 1139 | EXG     | 70 F | 0.445    | 239 0      | 3   |   | -0.07918 | 11 | 21 | 3 | 0.89 y     | n |
| 1141 | EXG     | 71 M | 0.34     | 267 1      | 1   |   | 0.045757 | 7  | 29 | 3 | -26.63 IOL | y |
| 1142 | POAG    | 70 F | 0.35     | 414 0      | 2 n | n | -0.07918 | 11 | 13 | 3 | -27.23 IOL | y |
| 1143 | POAG    | 61 F | 0.41     | 230 0      | 2 n | n | -0.07918 | 16 | 19 | 3 | -8.42 y    | y |
| 1144 | EXG     | 85 F | 0.46     | 252 0      | 1   |   | 0.30103  | 12 | 27 | 3 | -28.16 IOL | y |
| 1146 | control | 50 F | 0.445    | 663 0      | 3 n | n | -0.07918 |    | 12 | 0 | IOL        | y |
| 1152 | control | 68 M | 0.425    | 230 0      | 2 n | n | 0        | 12 | 12 | 0 | y          | n |
| 1154 | EXG     | 78 M | 0.55     | 405 0      | 2 y | n | 0.221849 | 18 | 18 | 2 | -3.66 y    | n |
| 1155 | control | 70 F | 0.416667 | 215.5 0    | 2   |   | -0.07918 | 19 | 20 | 0 | y          | n |
| 1158 | control | 38 M | 0.425    | 298.6667 0 | 1 n | n | -0.07918 | 12 | 16 | 0 | y          | n |
| 1161 | POAG    | 57 M | 0.426667 | 353 0      | 2   |   | -0.07918 | 11 | 19 | 3 | -17.06 IOL | y |
| 1162 | POAG    | 55 F | 0.415    | 487 0      | 2 n | n | -0.07918 | 15 | 20 | 2 | -9.85 y    | n |
| 1163 | POAG    | 81 F | 0.4      | 398.5 0    | 1 n | n | 0.154902 | 19 | 19 | 4 | -24.45 y   | n |
| 1165 | EXG     | 72 M | 0.52     | 326.5 0    | 2 y | n | 0        | 17 | 17 | 0 | -0.61 y    | n |
| 1177 | POAG    | 62 M | 0.5      | 355.5 0    | 2   |   | -0.07918 | 17 | 25 | 3 | -19.29 IOL | y |
| 1179 | EXG     | 74 F | 0.42     | 380 0      | 2 y | y | 0        | 18 | 39 | 3 | -19.39 IOL | y |
| 1194 | control | 83 F | 0.46     | 483 0      | 2 y | n | 0.221849 |    |    | 0 | y          | n |
| 1200 | POAG    | 48 F | 0.425    | 449.5 0    | 2   |   | -0.07918 | 11 | 22 | 4 | -20.27 y   | n |
| 1202 | POAG    | 83 F | 0.42     | 267 0      | 2 y | n | 0.39794  | 11 | 13 | 5 | -27.36 IOL | y |
| 1204 | POAG    | 66 M | 0.395    | 253.5 0    | 3 y | n | 1.39794  | 21 | 21 | 1 | -28 IOL    | y |
| 1205 | POAG    | 78 F | 0.425    | 224.5 0    | 2   |   | 0.522879 | 25 | 32 | 4 | -30.36 IOL | y |
| 1206 | POAG    | 71 M | 0.385    | 320 0      | 3 n | n | 0.154902 | 55 | 55 | 5 | -27.93 IOL | y |
| 1208 | POAG    | 62 M | 0.386667 | 373.5 0    | 1 y |   | 0.09691  | 13 | 19 | 2 | -24.38 y   | y |
| 1209 | control | 72 M | 0.515    | 590 0      | 3   |   | 0.221849 |    |    | 0 | y          | n |
| 1217 | POAG    | 62 F | 0.48     | 309.5 0    | 2 n | n | 0        | 12 | 17 | 3 | -22.59 IOL | y |
| 1218 | EXG     | 67 M | 0.516667 | 345 0      | 2   |   | -0.07918 | 13 | 45 | 3 | -18.22 IOL | y |
| 1219 | POAG    | 72 F | 0.365    | 519 0      | 3   | y | 0.30103  | 13 | 23 | 4 | -24.88 IOL | y |
| 1220 | POAG    | 54 M | 0.525    | 341 0      | 2 n | n | -0.07918 | 28 | 28 | 4 | -20.9 y    | n |
| 1232 | control | 78 M | 0.3      | 194 1      | 2   |   | -0.07918 | 17 | 35 | 0 | IOL        | y |
| 1237 | control | 80 F | 0.37     | 603 0      | 1   |   | 0.09691  |    |    | 0 | y          | n |
| 1238 | POAG    | 63 M | 0.465    | 273.6667 0 | 1 y | n | 0.522879 | 23 | 23 | 4 | -16.82 y   | n |
| 1239 | EXG     | 73 M | 0.485    | 236.5 0    | 1 y | n | 0.39794  | 27 | 27 | 4 | -30.45 y   | n |
| 1241 | POAG    | 65 F | 0.565    | 356.5 0    | 2   |   | 0.221849 | 8  | 8  | 0 | -26.87 IOL | y |
| 1242 | POAG    | 70 M | 0.46     | 234 0      | 1   |   | -0.07918 | 11 | 16 | 3 | -10.1 y    | n |
| 1243 | EXG     | 80 M | 0.61     | 207.5 0    | 0 y | n | 0        | 34 | 36 | 3 | -10.16 IOL | y |
| 1253 | control | 80 F | 0.445    | 349.5 0    | 1 n | n | 0.30103  | 15 | 15 | 0 | y          | n |
| 1255 | EXG     | 64 M | 0.46     | 287 0      | 3 y | n | -0.07918 | 27 | 27 | 0 | -2.37 y    | n |
| 1256 | POAG    | 65 M | 0.5      | 368 0      | 2 y | n | -0.07918 | 25 | 25 | 3 | -9.63 y    | n |
| 1263 | control | 72 F | 0.345    | 414.5 0    | 2 y | n | 0.30103  | 14 | 14 | 0 | y          | n |
| 1275 | POAG    | 67 M | 0.46     | 353.5 0    | 3 y | n | 1        | 16 | 16 | 3 | -23.34 y   | n |
| 1276 | POAG    | 77 F | 0.53     | 275 0      | 1   | n | -0.07918 | 19 | 19 | 2 | -8.96 IOL  | y |
| 1280 | EXG     | 68 M | 0.545    | 196 0      | 2 y |   | -0.07918 | 19 | 29 | 0 | -1.02 y    | y |
| 1281 | control | 91 F | 0.335    | 413.5 0    | 3 n | n | 0.221849 |    |    | 0 | y          | n |
| 1285 | EXG     | 67 F | 0.49     | 357.5 0    | 1 y | n | -0.07918 | 17 | 22 | 2 | -7.56 IOL  | y |
| 1286 | POAG    | 73 M | 0.46     | 212 1      | 1 y | n | -0.07918 | 16 | 21 | 3 | -14.75 IOL | y |
| 1292 | control | 84 F | 0.27     | 812 0      | 2 y | n | 0.045757 | 14 | 14 | 0 | IOL        | y |
| 1293 | EXG     | 81 M | 0.423333 | 354.5 0    | 2 n | y | 0.39794  | 15 | 15 | 0 | -11.2 y    | n |
| 1294 | control | 68 F | 0.46     | 384.5 0    | 2   |   | -0.07918 |    |    | 0 | IOL        | y |
| 1297 | POAG    | 79 M | 0.45     | 302 0      | 3   |   | 0.045757 | 11 | 20 | 3 | -11.1 IOL  | y |
| 1300 | POAG    | 73 F | 0.425    | 245 0      | 2 y |   | 0        | 9  | 27 | 0 | -8.64 y    | n |
| 1305 | POAG    | 83 F | 0.55     | 318 0      | 2 y |   | 1.522879 | 13 | 13 | 0 | -16.21 y   | n |
| 1309 | control | 53 F | 0.353333 | 274.5 0    | 2   |   | -0.07918 |    |    | 0 | y          | n |
| 1310 | control | 74 M | 0.495    | 324 0      | 2 y | n | 0.09691  |    |    | 0 | y          | n |
| 1311 | EXG     | 74 F | 0.616667 | 267.5 0    | 2   |   | 0.09691  | 11 | 13 | 4 | -31.02 IOL | y |
| 1327 | POAG    | 61 F | 0.5      | 429 0      | 2 y | n | 0.522879 | 15 | 17 | 2 | -15.97 y   | n |
| 1329 | POAG    | 72 M | 0.475    | 280 0      | 2 n | n | 0        | 31 | 31 | 4 | -8.1 IOL   | y |
| 1332 | control | 68 M | 0.585    | 389.3333 0 | 0   |   | 0.09691  |    |    | 0 | y          | n |
| 1336 | EXG     | 62 F | 0.42     | 285.5 0    | 2 n | n | 0.154902 | 21 | 32 | 3 | -23.71 IOL | y |
| 1337 | EXG     | 69 M | 0.28     | 321.5 1    | 1   | y | 0.154902 | 15 | 41 | 3 | -28.04 IOL | y |
| 1338 | EXG     | 69 F | 0.63     | 330 0      | 3 n | n | -0.07918 | 15 | 20 | 3 | -12.92 IOL | y |
| 1348 | EXG     | 72 F | 0.38     | 510.5 0    | 2 n | n | 0.09691  | 27 | 27 | 3 | -11.53 y   | n |
| 1349 | EXG     | 54 F | 0.395    | 467 0      | 2 n | n | 0.30103  | 32 | 50 | 5 | -22 y      | n |
| 1362 | POAG    | 54 M | 0.37     | 274.5 0    | 3 y | n | -0.07918 | 17 | 19 | 3 | -8.23 y    | y |
| 1364 | POAG    | 66 F | 0.44     | 389.5 0    | 2 y | n | 0        | 15 | 19 | 3 | -28.36 y   | y |
| 1366 | EXG     | 69 M | 0.41     | 313.5 0    | 2 n | n | 0.154902 | 17 | 17 | 4 | -11.01 y   | n |
| 1372 | control | 65 M | 0.395    | 167.5 1    | 1 y | n | 0.30103  | 18 | 18 | 0 | y          | n |
| 1384 | control | 90 F | 0.43     | 259 0      | 3   |   | 0.69897  |    |    | 0 | y          | n |
| 1385 | control | 83 M | 0.61     | 296 0      | 2 n | n | 0.39794  |    |    | 0 | y          | n |
| 1387 | control | 75 F | 0.553333 | 221 0      | 2   |   | 0.221849 |    |    | 0 | y          | n |
| 1391 | control | 73 F | 0.405    | 326.5 0    | 2 n | n | 0.09691  | 17 | 17 | 0 | y          | n |
| 1400 | control | 92 F | 0.5      | 123.5 0    | 3 n | n | 0.522879 | 14 | 14 | 0 | y          | n |
| 1410 | POAG    | 85 F | 0.42     | 580 0      | 3   |   | 0.045757 | 12 | 12 | 1 | -16.74 IOL | y |
| 1411 | POAG    | 83 M | 0.53     | 111 0      | 1   |   | 0.154902 | 15 | 15 | 1 | -27.97 IOL | y |
| 1412 | POAG    | 55 M | 0.345    | 267.5 0    | 1 y | n | -0.07918 | 49 | 49 | 6 | -3.48 y    | n |
| 1420 | POAG    | 62 M | 0.33     | 169 0      | 1 n | n | 0.69897  | 52 | 52 | 0 | -12.78 y   | n |
| 1425 | POAG    | 81 F | 0.5      | 477.5 0    | 2   | y | 1.09691  | 15 | 15 | 3 | -6.64 y    | n |
